# Supplementary material
Source: ML conference proceedings conference paper supplement (https://openreview.net/forum?id=MzaPEKHv-0J)
Supplement: supplementary_material [file attachment]

## 1 A Appendix

### 2 A.1 Effect of Background Augmentation

3 Reducing bias on the dataset is one of the fundamental problems in computer vision. A typical  
 4 example of data bias in the object-centric dataset is that the background of images contains locational  
 5 context. For instance, couch images are mostly captured in the living room, and motorcycle images  
 6 are taken outdoors hence the roadway or garage appears in the background most of the time. Such  
 7 a strong correlation between background information and the class labels makes the classification  
 8 networks biased toward the background so that the networks make predictions by looking at the  
 9 backgrounds rather than the foreground objects. Here, we demonstrate that our datasets, with  
 10 additional augmentations, are more resistant to such bias. We use a popular analysis tool, Grad-  
 11 CAM++ [1], to verify that the classification model trained with our dataset avoids overfitting on  
 12 backgrounds. We use the official Grad-CAM++ implementation and feed test images. According  
 13 to Figure a.1, the classification model trained on our dataset focuses on the object, whereas the  
 14 classification model trained on the original CO3D focuses on the background for many outdoor  
 15 scenes.

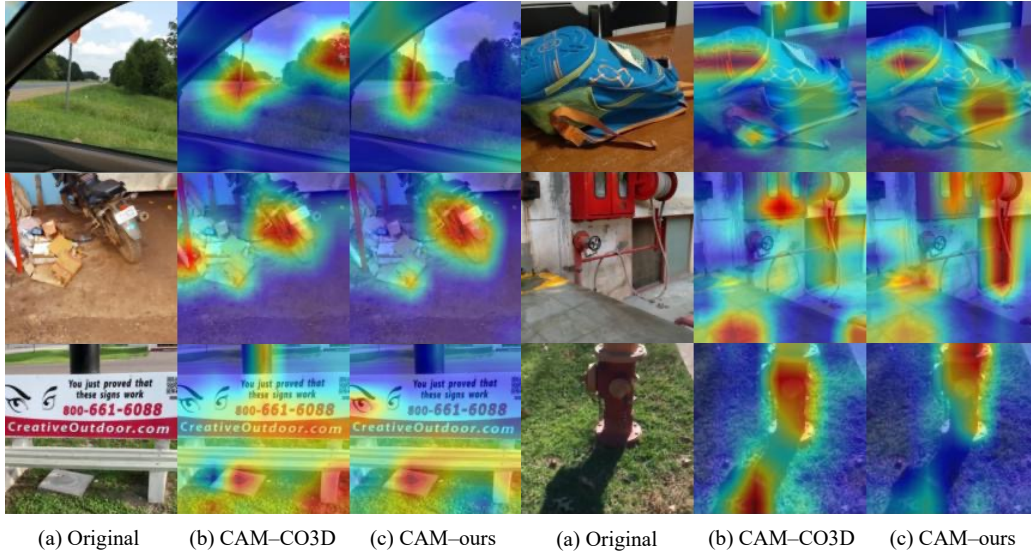

Figure a.1: Visualization of class activation maps generated by GradCAM++. The left and right activation maps are generated from the ResNet18 trained with the original CO3D images and PeRFception-CO3D images, respectively.

16 We also conduct control experiments about the strength of background augmentation. In detail,  
 17 we compare evaluated performance by changing the probability, *i.e.*, 0%, 50%, and 100%, to apply  
 18 the background augmentation for each iteration. In comparison to the results without background  
 19 augmentation, the background augmentation with a probability of 50% increases the 2D classifica-  
 20 tion accuracy; whereas the 100% probability of background augmentation does not improve the  
 21 performance. In this ablation study, we determine the appropriate level of background augmentation  
 22 assistance for improving 2D classification accuracy. Table a.1 reports the results of the control  
 23 experiments.

24 We also visualize several examples of background augmented images on Figure a.4.

Table a.1: 2D classification accuracies (Acc@1/Acc@5) of the ResNet model trained either on CO3D or PeRFception-CO3D and evaluated either on CO3D or PeRFception-CO3D. \* denotes the ImageNet[2] pretrained network. PeRF-CO3D is an abbreviation of PeRFception-CO3D.  $p$  stands for the probability to apply background augmentation.

| Train Dataset              | CO3D             |                  | PeRF-CO3D (p=0.0) |                  | PeRF-CO3D (p=0.5) |                  | PeRF-CO3D (p=1.0) |                  |
|----------------------------|------------------|------------------|-------------------|------------------|-------------------|------------------|-------------------|------------------|
| Test Dataset               | CO3D             | PeRF-CO3D        | CO3D              | PeRF-CO3D        | CO3D              | PeRF-CO3D        | CO3D              | PeRF-CO3D        |
| Acc@1 ( $\mu \pm \sigma$ ) |                  |                  |                   |                  |                   |                  |                   |                  |
| ResNet18                   | 84.74 $\pm$ 0.04 | 80.39 $\pm$ 0.19 | 82.56 $\pm$ 0.24  | 81.43 $\pm$ 0.14 | 83.15 $\pm$ 0.10  | 82.05 $\pm$ 0.24 | 81.93 $\pm$ 0.10  | 81.31 $\pm$ 0.12 |
| ResNet34                   | 86.18 $\pm$ 0.05 | 81.62 $\pm$ 0.10 | 83.98 $\pm$ 0.07  | 82.71 $\pm$ 0.17 | 84.62 $\pm$ 0.14  | 83.61 $\pm$ 0.04 | 83.40 $\pm$ 0.10  | 82.54 $\pm$ 0.22 |
| ResNet50                   | 86.83 $\pm$ 0.02 | 82.19 $\pm$ 0.09 | 84.12 $\pm$ 0.28  | 82.80 $\pm$ 0.37 | 84.83 $\pm$ 0.14  | 83.77 $\pm$ 0.08 | 83.60 $\pm$ 0.11  | 82.73 $\pm$ 0.04 |
| ResNet101                  | 87.42 $\pm$ 0.04 | 82.86 $\pm$ 0.06 | 84.97 $\pm$ 0.13  | 83.71 $\pm$ 0.13 | 85.95 $\pm$ 0.22  | 85.11 $\pm$ 0.23 | 85.01 $\pm$ 0.08  | 83.82 $\pm$ 0.05 |
| ResNet152                  | 87.75 $\pm$ 0.11 | 83.04 $\pm$ 0.11 | 85.67 $\pm$ 0.31  | 84.35 $\pm$ 0.19 | 86.40 $\pm$ 0.04  | 85.28 $\pm$ 0.02 | 85.11 $\pm$ 0.09  | 84.06 $\pm$ 0.09 |
| ResNext50                  | 86.84 $\pm$ 0.29 | 81.99 $\pm$ 0.14 | 84.21 $\pm$ 0.08  | 83.04 $\pm$ 0.04 | 85.25 $\pm$ 0.16  | 84.32 $\pm$ 0.18 | 84.06 $\pm$ 0.38  | 83.23 $\pm$ 0.28 |
| ResNext101                 | 87.73 $\pm$ 0.03 | 82.90 $\pm$ 0.07 | 85.22 $\pm$ 0.09  | 84.17 $\pm$ 0.15 | 86.37 $\pm$ 0.10  | 85.48 $\pm$ 0.06 | 85.46 $\pm$ 0.16  | 84.46 $\pm$ 0.11 |
| WideResNet50               | 87.32 $\pm$ 0.05 | 82.45 $\pm$ 0.11 | 84.68 $\pm$ 0.15  | 83.64 $\pm$ 0.27 | 85.58 $\pm$ 0.10  | 84.68 $\pm$ 0.02 | 84.35 $\pm$ 0.12  | 83.46 $\pm$ 0.24 |
| WideResNet101              | 87.80 $\pm$ 0.12 | 83.04 $\pm$ 0.10 | 85.36 $\pm$ 0.26  | 84.15 $\pm$ 0.19 | 86.32 $\pm$ 0.21  | 85.30 $\pm$ 0.11 | 85.45 $\pm$ 0.13  | 84.23 $\pm$ 0.23 |
| ResNet18*                  | 87.75 $\pm$ 0.18 | 82.70 $\pm$ 0.15 | 85.28 $\pm$ 0.14  | 84.09 $\pm$ 0.20 | 85.97 $\pm$ 0.16  | 84.97 $\pm$ 0.13 | 84.62 $\pm$ 0.02  | 83.62 $\pm$ 0.13 |
| ResNet34*                  | 88.83 $\pm$ 0.06 | 84.01 $\pm$ 0.12 | 86.60 $\pm$ 0.27  | 85.43 $\pm$ 0.22 | 87.19 $\pm$ 0.31  | 86.25 $\pm$ 0.19 | 86.09 $\pm$ 0.11  | 85.01 $\pm$ 0.09 |
| ResNet50*                  | 89.51 $\pm$ 0.21 | 84.76 $\pm$ 0.04 | 87.49 $\pm$ 0.11  | 86.60 $\pm$ 0.08 | 88.12 $\pm$ 0.08  | 87.30 $\pm$ 0.08 | 87.09 $\pm$ 0.12  | 86.25 $\pm$ 0.17 |
| ResNet101*                 | 90.21 $\pm$ 0.09 | 85.60 $\pm$ 0.16 | 88.39 $\pm$ 0.22  | 87.46 $\pm$ 0.17 | 89.00 $\pm$ 0.07  | 88.32 $\pm$ 0.13 | 88.28 $\pm$ 0.07  | 87.26 $\pm$ 0.01 |
| ResNet152*                 | 90.60 $\pm$ 0.10 | 86.26 $\pm$ 0.10 | 89.17 $\pm$ 0.15  | 88.19 $\pm$ 0.03 | 89.52 $\pm$ 0.20  | 88.73 $\pm$ 0.15 | 88.63 $\pm$ 0.20  | 87.59 $\pm$ 0.13 |
| ResNext50*                 | 89.21 $\pm$ 0.14 | 83.90 $\pm$ 0.28 | 87.28 $\pm$ 0.06  | 86.28 $\pm$ 0.14 | 87.82 $\pm$ 0.19  | 87.30 $\pm$ 0.06 | 86.81 $\pm$ 0.27  | 86.09 $\pm$ 0.25 |
| ResNext101*                | 90.52 $\pm$ 0.07 | 85.91 $\pm$ 0.13 | 88.51 $\pm$ 0.19  | 87.82 $\pm$ 0.06 | 89.17 $\pm$ 0.07  | 88.51 $\pm$ 0.16 | 88.57 $\pm$ 0.02  | 87.60 $\pm$ 0.18 |
| WideResNet50*              | 89.78 $\pm$ 0.06 | 85.13 $\pm$ 0.33 | 87.80 $\pm$ 0.18  | 86.88 $\pm$ 0.06 | 88.23 $\pm$ 0.10  | 87.75 $\pm$ 0.25 | 87.12 $\pm$ 0.11  | 86.50 $\pm$ 0.08 |
| WideResNet101*             | 90.45 $\pm$ 0.10 | 85.97 $\pm$ 0.09 | 88.53 $\pm$ 0.04  | 87.59 $\pm$ 0.12 | 89.22 $\pm$ 0.13  | 88.39 $\pm$ 0.07 | 88.10 $\pm$ 0.11  | 87.20 $\pm$ 0.10 |
| Acc@5 ( $\mu \pm \sigma$ ) |                  |                  |                   |                  |                   |                  |                   |                  |
| ResNet18                   | 96.24 $\pm$ 0.17 | 94.19 $\pm$ 0.16 | 95.55 $\pm$ 0.18  | 95.00 $\pm$ 0.15 | 95.70 $\pm$ 0.11  | 95.37 $\pm$ 0.05 | 95.30 $\pm$ 0.08  | 94.85 $\pm$ 0.09 |
| ResNet34                   | 96.68 $\pm$ 0.11 | 94.62 $\pm$ 0.11 | 95.88 $\pm$ 0.07  | 95.37 $\pm$ 0.10 | 96.23 $\pm$ 0.03  | 95.89 $\pm$ 0.06 | 95.74 $\pm$ 0.11  | 95.29 $\pm$ 0.07 |
| ResNet50                   | 96.90 $\pm$ 0.07 | 94.67 $\pm$ 0.14 | 96.10 $\pm$ 0.02  | 95.51 $\pm$ 0.13 | 96.41 $\pm$ 0.11  | 95.99 $\pm$ 0.08 | 96.01 $\pm$ 0.07  | 95.48 $\pm$ 0.04 |
| ResNet101                  | 97.04 $\pm$ 0.03 | 94.78 $\pm$ 0.05 | 96.23 $\pm$ 0.07  | 95.58 $\pm$ 0.09 | 96.76 $\pm$ 0.10  | 96.32 $\pm$ 0.12 | 96.39 $\pm$ 0.03  | 95.74 $\pm$ 0.14 |
| ResNet152                  | 97.14 $\pm$ 0.04 | 94.94 $\pm$ 0.09 | 96.32 $\pm$ 0.09  | 95.73 $\pm$ 0.05 | 96.86 $\pm$ 0.06  | 96.39 $\pm$ 0.06 | 96.46 $\pm$ 0.07  | 95.92 $\pm$ 0.09 |
| ResNext50                  | 96.75 $\pm$ 0.12 | 94.54 $\pm$ 0.10 | 95.95 $\pm$ 0.15  | 95.32 $\pm$ 0.13 | 96.49 $\pm$ 0.10  | 95.92 $\pm$ 0.16 | 96.08 $\pm$ 0.12  | 95.47 $\pm$ 0.15 |
| ResNext101                 | 96.98 $\pm$ 0.07 | 94.71 $\pm$ 0.12 | 96.09 $\pm$ 0.11  | 95.54 $\pm$ 0.07 | 96.71 $\pm$ 0.01  | 96.26 $\pm$ 0.03 | 96.49 $\pm$ 0.04  | 95.80 $\pm$ 0.03 |
| WideResNet50               | 96.84 $\pm$ 0.13 | 94.60 $\pm$ 0.10 | 96.05 $\pm$ 0.04  | 95.52 $\pm$ 0.05 | 96.44 $\pm$ 0.11  | 96.03 $\pm$ 0.03 | 96.10 $\pm$ 0.16  | 95.55 $\pm$ 0.01 |
| WideResNet101              | 97.05 $\pm$ 0.01 | 94.91 $\pm$ 0.08 | 96.26 $\pm$ 0.07  | 95.70 $\pm$ 0.08 | 96.86 $\pm$ 0.11  | 96.31 $\pm$ 0.10 | 96.49 $\pm$ 0.06  | 95.89 $\pm$ 0.01 |
| ResNet18*                  | 97.13 $\pm$ 0.10 | 95.04 $\pm$ 0.16 | 96.39 $\pm$ 0.08  | 95.89 $\pm$ 0.03 | 96.73 $\pm$ 0.04  | 96.24 $\pm$ 0.09 | 96.19 $\pm$ 0.08  | 95.67 $\pm$ 0.10 |
| ResNet34*                  | 97.39 $\pm$ 0.14 | 95.28 $\pm$ 0.15 | 96.67 $\pm$ 0.08  | 96.18 $\pm$ 0.04 | 97.00 $\pm$ 0.13  | 96.50 $\pm$ 0.09 | 96.61 $\pm$ 0.05  | 96.02 $\pm$ 0.03 |
| ResNet50*                  | 97.60 $\pm$ 0.04 | 95.46 $\pm$ 0.02 | 96.84 $\pm$ 0.04  | 96.39 $\pm$ 0.07 | 97.11 $\pm$ 0.05  | 96.69 $\pm$ 0.08 | 96.95 $\pm$ 0.06  | 96.37 $\pm$ 0.13 |
| ResNet101*                 | 97.90 $\pm$ 0.03 | 95.86 $\pm$ 0.05 | 97.06 $\pm$ 0.19  | 96.74 $\pm$ 0.11 | 97.48 $\pm$ 0.02  | 97.13 $\pm$ 0.05 | 97.16 $\pm$ 0.04  | 96.57 $\pm$ 0.03 |
| ResNet152*                 | 97.97 $\pm$ 0.04 | 95.97 $\pm$ 0.04 | 97.32 $\pm$ 0.17  | 96.87 $\pm$ 0.13 | 97.66 $\pm$ 0.07  | 97.24 $\pm$ 0.08 | 97.22 $\pm$ 0.17  | 96.69 $\pm$ 0.09 |
| ResNext50*                 | 97.33 $\pm$ 0.09 | 94.99 $\pm$ 0.11 | 96.54 $\pm$ 0.09  | 96.04 $\pm$ 0.02 | 97.08 $\pm$ 0.14  | 96.66 $\pm$ 0.07 | 96.57 $\pm$ 0.12  | 96.03 $\pm$ 0.04 |
| ResNext101*                | 97.67 $\pm$ 0.03 | 95.51 $\pm$ 0.06 | 96.90 $\pm$ 0.02  | 96.61 $\pm$ 0.03 | 97.32 $\pm$ 0.05  | 96.93 $\pm$ 0.07 | 97.07 $\pm$ 0.04  | 96.52 $\pm$ 0.05 |
| WideResNet50*              | 97.60 $\pm$ 0.07 | 95.53 $\pm$ 0.17 | 96.75 $\pm$ 0.10  | 96.39 $\pm$ 0.08 | 97.13 $\pm$ 0.02  | 96.84 $\pm$ 0.09 | 96.72 $\pm$ 0.07  | 96.22 $\pm$ 0.05 |
| WideResNet101*             | 97.76 $\pm$ 0.07 | 95.67 $\pm$ 0.04 | 97.01 $\pm$ 0.05  | 96.62 $\pm$ 0.07 | 97.48 $\pm$ 0.07  | 97.10 $\pm$ 0.06 | 96.93 $\pm$ 0.09  | 96.48 $\pm$ 0.06 |

## 25 A.2 Implementation Details

26 Here, we describe the thorough details of the data generation with Plenoxels [3] and the data  
 27 augmentation methods proposed in our main paper. We also provide the architectural details of 3D  
 28 semantic segmentation models trained on PeRFception-ScanNet dataset.

### 29 A.2.1 Data Generation

30 We use the official implementation of Plenoxels [3], which is implemented in PyTorch with custom  
 31 CUDA kernels. With a single RTX 3090 GPU, it takes up to 30 minutes per scene.

32 **PeRFception-CO3D.** Plenoxels uses a different learning rate for each parameter. Following the  
 33 default configuration for rendering Tanks and Temples [4] dataset, we use the learning rate 30 for  
 34 density values and  $10^{-2}$  for spherical harmonic coefficients. We skip foreground rendering for 1,000  
 35 steps at the beginning of training for stable training. For total variation losses, we set the weight  $\lambda$  as  
 36  $5.0 \times 10^{-5}$  for foreground densities,  $5.0 \times 10^{-3}$  for foreground spherical harmonics,  $1.0 \times 10^{-3}$  for  
 37 background colors, and  $1.0 \times 10^{-3}$  for background densities. The background brightness is set to  
 38 0.5. We set the lambda value to  $10^{-5}$  for the beta loss and  $10^{-10}$  for the sparsity loss, which is 10  
 39 times larger than the default configuration. We use the 9-dimensional spherical harmonic coefficients

for each RGB channel. We prune voxels whose density values are below 1.28 during the upsampling step.

**PeRFception-ScanNet.** As we described in Section 4.2 in our main paper, we initialize the voxel grid with point clouds that are obtained by TSDF integration for smoother surface geometry. The unprojected depth maps are aggregated into TSDF volume using the ground truth camera parameters. Since the ScanNet depth maps often contain noisy observations, the resulting point cloud is contaminated with outlier points. To filter out the outliers, we discretize the point cloud into coarse voxels with discretization size of 5cm and perform connected component analysis to detect disconnected voxels which are likely to be outliers. The refined point cloud is then utilized as the initialization for Plenoxels. The voxel grid is initialized with  $256^3$  resolution and trained for 51,200 iterations. All the other hyperparameters are same with CO3D but removed background rendering since all the points of ScanNet datasets should be considered as foregrounds.

The input images are resized into  $640 \times 480$  resolution. For all scenes, we exclude image frames that are severely affected by motion blurs. Detecting blurriness was done automatically by OpenCV blur detection algorithm and we filter out the 150 most blurry frames at most. We consider a scene defective when the number of frames is too low after filtering blur images.

### A.2.2 Random Pose Selection

Plenoxels show great rendering quality when the camera pose is close to the camera poses in the train set. Unfortunately, it fails to reliably render frames when attempting to render extremely unobserved parts, which are significantly out of train-view coverage. Thus, selecting appropriate poses is crucial for photorealistic image generation. We propose an operation that selects an intermediate pose from two input poses. The operator AA2R converts the axis-angle representation, i.e.,  $(v, \theta)$  where  $v$  stands for the axis and  $\theta$  stands for the angle, to the rotation matrix. R2AA is exactly the inverse operation of AA2R. We compute the distance between the selected poses with distance functions  $D_R$  and  $D_t$  to choose a pair of poses that are close enough. We use the rotation threshold  $\theta = \frac{1}{24}\pi$  and the translation threshold 0.5.

$$\begin{aligned} \text{ReduceAngle}(\mathbf{R}, s) &= \text{AA2R}(\text{R2AA}(\mathbf{R})_v, s \cdot \text{R2AA}(\mathbf{R})_\theta) \\ \text{IntermediateRot}(\mathbf{R}_1, \mathbf{R}_2, s) &= \text{ReduceAngle}(\mathbf{R}_2 \mathbf{R}_1^{-1}, s) \mathbf{R}_1 \\ D_R(\mathbf{R}_1, \mathbf{R}_2) &= \arccos(\text{Tr}(\mathbf{R}_2^{-1} \mathbf{R}_1)/2 - 1) \\ D_t(\mathbf{t}_1, \mathbf{t}_2) &= \|\mathbf{t}_2 - \mathbf{t}_1\|_2^2 \end{aligned}$$

The main concept of the Algo 1 is to select an intermediate camera pose between randomly selected camera poses in the train set. For intrinsic parameters and image shape, we randomly select intrinsic matrix among intrinsic matrices in train set and use the corresponding image shape.

### A.2.3 Architectural Details

We train three variants of 3D ResUNets implemented with sparse convolutional layers [5] for semantic segmentation on PeRFception-ScanNet dataset. The layer-wise architectural details are depicted in Table a.2.

### A.3 Analysis on Rate-Distortion Trade-off

We compare the reconstruction qualities by varying the resolution: 64, 128, 256, and 384. We follow the setup from our paper and measure the average memory footprint and error metrics (PSNR, SSIM, LPIPS) per scene on the randomly selected subset of our PeRFception-CO3D dataset. We report the evaluated scores in Table a.3. The model with 128 resolution has shown the best trade-off between memory and reconstruction quality.

We also explore several quantization methods and their optimal compression bit. We report the evaluated scores in Table a.4. “ours (SH)” applies our quantization on spherical harmonics coefficients

---

**Algorithm 1** Random Pose Generation

---

Input  
   $P = \{\{\mathbf{R}_i, \mathbf{t}_i\}\}_{i=1,2,\dots,N}$  : The set of poses in train split  
   $\theta$ : The rotation distance threshold  
   $d$ : The translation distance threshold  
Output  
   $\mathbf{p}_{\text{out}} \in \mathbb{R}^{4 \times 4}$  : The output pose  
  
   $s$ : A random value from  $[0, 1]$   
   $j, k = \text{RandomIndex}(N), \text{RandomIndex}(N)$   
  **while**  $D_R(\mathbf{R}_j, \mathbf{R}_k) \geq \theta$  and  $D_t(\mathbf{t}_j, \mathbf{t}_k) \geq d$  **do**  
     $j, k = \text{RandomIndex}(N), \text{RandomIndex}(N)$   
  **end while**  
   $\mathbf{R}_{jk} = \text{IntermediateRot}(\mathbf{R}_j, \mathbf{R}_k, s)$   
   $\mathbf{p}_{\text{out}}[:3, :3] = \mathbf{R}_{jk}$   
   $\mathbf{p}_{\text{out}}[:3, 3] = s\mathbf{t}_k + (1 - s)\mathbf{t}_j$   
   $\mathbf{p}_{\text{out}}[3, 3] = 1$   
  **return**  $\mathbf{p}_{\text{out}}$

---

Table a.2: Architectures of Res16UNet variants for semantic segmentation on PeRFception-ScanNet. We denote a convolution layer with its *kernel size*, *output channel size*, and *convolution stride size*. All convolution layers except for the last layer have a Batch Normalization and a ReLU layer after them. The layers with the tag "conv\_tr" indicates the transposed convolution layers. We use a square bracket to denote a residual block, with the number of blocks stacked.

| layer name | Res16UNet14A                                                                                      | Res16UNet18A                                                                                      | Res16UNet34C                                                                                      |
|------------|---------------------------------------------------------------------------------------------------|---------------------------------------------------------------------------------------------------|---------------------------------------------------------------------------------------------------|
| init       |                                                                                                   | $3^3, 32, \text{stride } 1$                                                                       |                                                                                                   |
| conv1      |                                                                                                   | $2^3, 32, \text{stride } 2$                                                                       |                                                                                                   |
| block1     | $\begin{bmatrix} 3^3, 32, \text{stride } 1 \\ 3^3, 32, \text{stride } 1 \end{bmatrix} \times 1$   | $\begin{bmatrix} 3^3, 32, \text{stride } 1 \\ 3^3, 32, \text{stride } 1 \end{bmatrix} \times 2$   | $\begin{bmatrix} 3^3, 32, \text{stride } 1 \\ 3^3, 32, \text{stride } 1 \end{bmatrix} \times 2$   |
| conv2      |                                                                                                   | $2^3, 32, \text{stride } 2$                                                                       |                                                                                                   |
| block2     | $\begin{bmatrix} 3^3, 64, \text{stride } 1 \\ 3^3, 64, \text{stride } 1 \end{bmatrix} \times 1$   | $\begin{bmatrix} 3^3, 64, \text{stride } 1 \\ 3^3, 64, \text{stride } 1 \end{bmatrix} \times 2$   | $\begin{bmatrix} 3^3, 64, \text{stride } 1 \\ 3^3, 64, \text{stride } 1 \end{bmatrix} \times 3$   |
| conv3      |                                                                                                   | $2^3, 64, \text{stride } 2$                                                                       |                                                                                                   |
| block3     | $\begin{bmatrix} 3^3, 128, \text{stride } 1 \\ 3^3, 128, \text{stride } 1 \end{bmatrix} \times 1$ | $\begin{bmatrix} 3^3, 128, \text{stride } 1 \\ 3^3, 128, \text{stride } 1 \end{bmatrix} \times 2$ | $\begin{bmatrix} 3^3, 128, \text{stride } 1 \\ 3^3, 128, \text{stride } 1 \end{bmatrix} \times 4$ |
| conv4      |                                                                                                   | $2^2, 128, \text{stride } 2$                                                                      |                                                                                                   |
| block4     | $\begin{bmatrix} 3^3, 256, \text{stride } 1 \\ 3^3, 256, \text{stride } 1 \end{bmatrix} \times 1$ | $\begin{bmatrix} 3^3, 256, \text{stride } 1 \\ 3^3, 256, \text{stride } 1 \end{bmatrix} \times 2$ | $\begin{bmatrix} 3^3, 256, \text{stride } 1 \\ 3^3, 256, \text{stride } 1 \end{bmatrix} \times 6$ |
| conv4_tr   |                                                                                                   | $2^3, 128, \text{stride } 2$                                                                      | $2^3, 256, \text{stride } 2$                                                                      |
| block5     | $\begin{bmatrix} 3^3, 128, \text{stride } 1 \\ 3^3, 128, \text{stride } 1 \end{bmatrix} \times 1$ | $\begin{bmatrix} 3^3, 128, \text{stride } 1 \\ 3^3, 128, \text{stride } 1 \end{bmatrix} \times 2$ | $\begin{bmatrix} 3^3, 256, \text{stride } 1 \\ 3^3, 256, \text{stride } 1 \end{bmatrix} \times 2$ |
| conv5_tr   |                                                                                                   | $2^2, 128, \text{stride } 2$                                                                      |                                                                                                   |
| block6     | $\begin{bmatrix} 3^3, 128, \text{stride } 1 \\ 3^3, 128, \text{stride } 1 \end{bmatrix} \times 1$ | $\begin{bmatrix} 3^3, 128, \text{stride } 1 \\ 3^3, 128, \text{stride } 1 \end{bmatrix} \times 2$ | $\begin{bmatrix} 3^3, 128, \text{stride } 1 \\ 3^3, 128, \text{stride } 1 \end{bmatrix} \times 2$ |
| conv6_tr   |                                                                                                   | $2^3, 96, \text{stride } 2$                                                                       |                                                                                                   |
| block7     | $\begin{bmatrix} 3^3, 96, \text{stride } 1 \\ 3^3, 96, \text{stride } 1 \end{bmatrix} \times 1$   | $\begin{bmatrix} 3^3, 96, \text{stride } 1 \\ 3^3, 96, \text{stride } 1 \end{bmatrix} \times 2$   | $\begin{bmatrix} 3^3, 96, \text{stride } 1 \\ 3^3, 96, \text{stride } 1 \end{bmatrix} \times 2$   |
| conv7_tr   |                                                                                                   | $2^3, 96, \text{stride } 2$                                                                       |                                                                                                   |
| block8     | $\begin{bmatrix} 3^3, 96, \text{stride } 1 \\ 3^3, 96, \text{stride } 1 \end{bmatrix} \times 1$   | $\begin{bmatrix} 3^3, 96, \text{stride } 1 \\ 3^3, 96, \text{stride } 1 \end{bmatrix} \times 2$   | $\begin{bmatrix} 3^3, 96, \text{stride } 1 \\ 3^3, 96, \text{stride } 1 \end{bmatrix} \times 2$   |
| final      |                                                                                                   | $1^3, 20, \text{stride } 1$                                                                       |                                                                                                   |



Table a.3: Reconstruction quality and required memory for different voxel resolutions.

| Resolution | Memory(MB) | PSNR( $\uparrow$ ) | SSIM( $\uparrow$ ) | LPIPS( $\downarrow$ ) |
|------------|------------|--------------------|--------------------|-----------------------|
| 64         | 38.0       | 26.56              | 0.7464             | 0.4827                |
| 128        | 47.2       | 29.39              | 0.8081             | 0.4017                |
| 256        | 63.2       | 30.81              | 0.8551             | 0.3353                |
| 384        | 161.2      | 31.03              | 0.8619             | 0.3202                |

only; “ours (**SH+D**)” applies our quantization to both spherical harmonics coefficients and densities. “clip” clips the feature values to a heuristically searched interval. In detail, we have clipped values that are statistically found from 5 scenes. For spherical harmonics, we clipped values to  $[-0.1, 0.1]$  since 90% of values are located inside the selected interval. For density values, we clipped to  $[0, 1000]$  to remove negative densities. We additionally seek the optimal bit for each compression method. Original quantization method with 8 bit compression, i.e., ours(SH)-8bit, has shown the best performance and has reasonable memory requirement.

Table a.4: Analysis on the memory usage and reconstruction quality of different quantization methods and their quantization bits.

| Quantization Method    | Bit | Memory(MB) | PSNR( $\uparrow$ ) | SSIM( $\uparrow$ ) | LPIPS( $\downarrow$ ) |
|------------------------|-----|------------|--------------------|--------------------|-----------------------|
| ours ( <b>SH</b> )     | 16  | 114.5      | 30.65              | 0.8548             | 0.3363                |
| ours ( <b>SH</b> )     | 8   | 63.2       | 30.81              | 0.8551             | 0.3353                |
| ours ( <b>SH</b> )     | 4   | 37.4       | 27.48              | 0.7932             | 0.4512                |
| ours ( <b>SH</b> )     | 2   | 24.8       | 14.69              | 0.5325             | 0.6797                |
| ours ( <b>SH + D</b> ) | 8   | 60.8       | 30.53              | 0.8546             | 0.3369                |
| ours ( <b>SH + D</b> ) | 4   | 34.8       | 23.07              | 0.7238             | 0.5166                |
| ours ( <b>SH + D</b> ) | 2   | 21.8       | 14.65              | 0.5280             | 0.9981                |
| clip                   | 8   | 62.6       | 17.78              | 0.7227             | 0.4879                |
| clip                   | 4   | 37.4       | 17.72              | 0.6575             | 0.5502                |
| clip                   | 2   | 24.4       | 16.66              | 0.6476             | 0.5881                |

We additionally explore the effect of **progressive scaling**, i.e. upsampling and pruning step of Plenoxel [3] to progressively increase the resolution on memory footprint and rendering quality. We consider two progressive scaling methods: **weight-based scaling** and **density-based scaling**. According to Plenoxels [3], **weight-based scaling** applies threshold to the maximum weight  $T_i(1 - \exp(1 - \sigma_i \delta_i))$  of each voxel over all training rays, whereas **density-based scaling** directly prunes voxels by their density values. For more details, please refer to the supplementary materials of Plenoxels. For each method, we change the threshold of each scaling method to find a good adjustment between memory usage and rendering quality. We report the evaluated scores in Table a.5. We select the “density-based scaling” method as our progressive scaling method with a sigma threshold 20, which has shown the best trade-off between memory footprint and rendering quality.

Table a.5: Analysis on the progressive scaling methods with varying the pruning threshold.

| Progressive Scaling Method   | Threshold | Memory(MB) | PSNR( $\uparrow$ ) | SSIM( $\uparrow$ ) | LPIPS( $\downarrow$ ) |
|------------------------------|-----------|------------|--------------------|--------------------|-----------------------|
| Density                      | 5         | 69.0       | 30.66              | 0.8554             | 0.3352                |
| Density                      | 10        | 66.4       | 30.79              | 0.8550             | 0.3354                |
| Density (ours)               | 20        | 63.2       | 30.81              | 0.8551             | 0.3353                |
| Density                      | 100       | 49.8       | 30.47              | 0.8547             | 0.3537                |
| Weight (Plenoxels - default) | 1.28      | 75.8       | 30.81              | 0.8557             | 0.3333                |
| Weight                       | 2.56      | 73.0       | 30.71              | 0.8560             | 0.3335                |

Table a.6: PSNR of PeRFception-ScanNet dataset with varying resolutions. PCTL stands for *percentile*.

| Reso | Mem (GB) | Avg. PSNR (dB)   | 50th PCTL | 75th PCTL | 90th PCTL | 95th PCTL |
|------|----------|------------------|-----------|-----------|-----------|-----------|
| 128  | 28.7     | 23.20 $\pm$ 3.69 | 23.59     | 26.14     | 27.94     | 29.12     |
| 256  | 43.8     | 23.01 $\pm$ 3.96 | 23.38     | 26.10     | 28.02     | 29.20     |
| 512  | 113.8    | 22.94 $\pm$ 4.26 | 23.22     | 26.35     | 28.34     | 29.49     |

We also analyze the *resolution vs. rendering quality* trade-off on our PeRFception-ScanNet dataset. To measure the trade-off rates, we train Plenoxels with lower (128) and higher (512) resolutions than the default configuration (256) on a randomly selected subset of ScanNet scenes.

As reported in Table a.6 and Figure a.2, there is no direct correlation between the resolution and the average rendering quality on ScanNet reconstruction. This could be attributed to various non-trivial factors. We visualized the histogram of PSNR distribution on the ScanNet dataset in Figure a.2. The X-axis represents the PSNR score, and Y-axis represents the percentage of scenes. Note that the PSNR distribution of the higher resolution Plenoxel reconstructions exhibits fat-tailed distribution, whereas the lower resolution reconstructions show the long-tailed distribution. We speculate that this is due to the fact that higher resolution reconstruction results in each voxel learning spherical harmonics parameters from fewer rays. Thus, errors in camera parameters or motion blur would result in larger errors for smaller voxels as parameters are learned from fewer rays. Thus, the rendering quality increases for the scenes with accurate camera poses and less motion blur, while it decreases for noisy scenes. We conjecture that higher resolution reconstruction would yield better performance if we have high-resolution images with accurate camera poses.

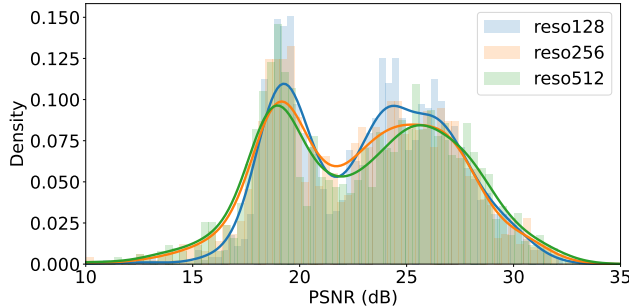

Figure a.2: Distributions of PSNR values of PeRFception-ScanNet dataset with varying resolutions.

#### A.4 Dataset Statistics

PeRFception-CO3D dataset includes 18,618 object-centric scenes that cover all of the original CO3D dataset scenes, only except those with incorrect camera poses. It contains a fair quantity of 51 different object-class labeled scenes; see Figure a.3.

#### A.5 Camera Manipulation

Camera manipulation has been one of the inaccessible augmentation techniques on conventional image datasets. In contrast, our implicit data can be rendered from many continuous viewpoints and with arbitrary camera parameters (*e.g.*, intrinsics, extrinsics, and radial distortions), allowing us to generate images with non-standard but realistic camera-level augmentations. We have not adopted this augmentation skill while training 2D classification networks since most images do not have distortions. We perform camera intrinsics augmentation and camera distortion augmentation and Figure a.4 visualizes several examples of such camera manipulations.

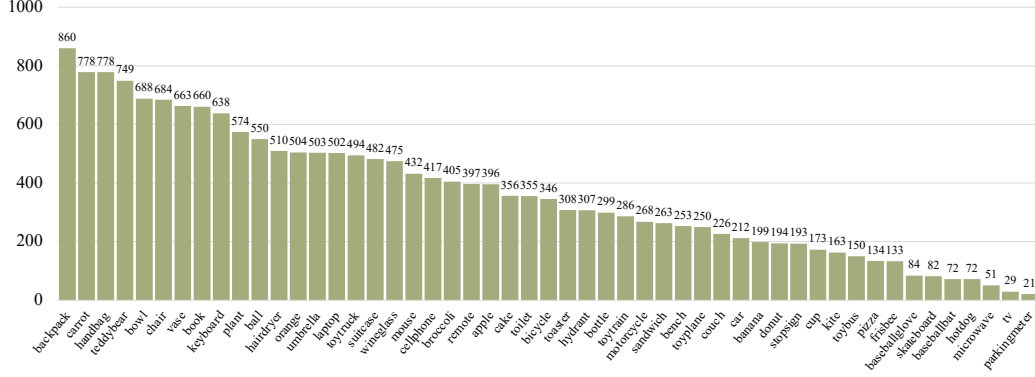

Figure a.3: Statistics of PeRFception-CO3D dataset scene per object-class. The y-axis visualizes the number of scenes for each class.

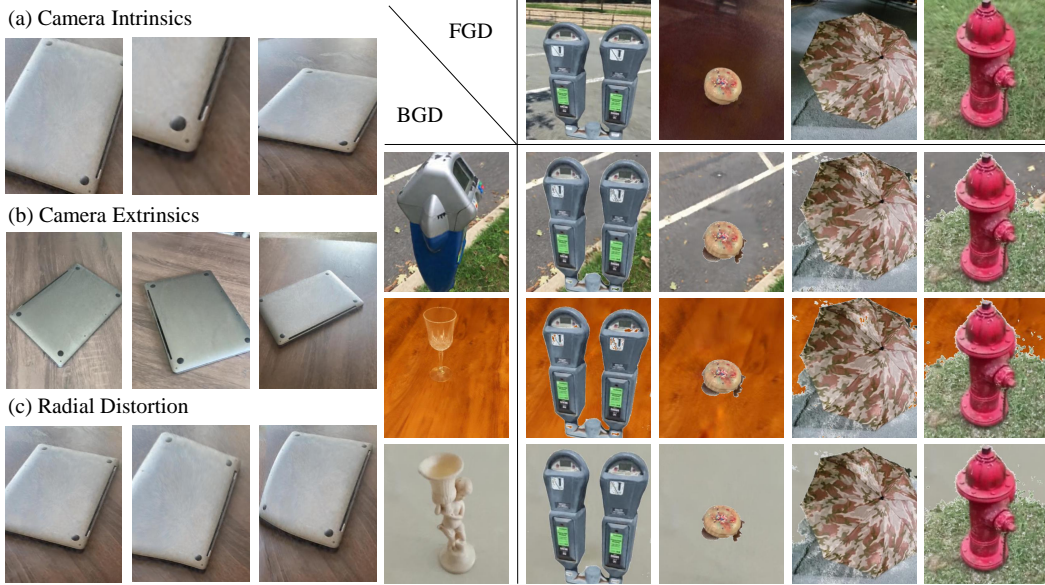

Figure a.4: Examples of camera manipulation and background augmentations. FGD and BGD are source images for foreground and background respectively.

## 128 A.6 Quantitative Results

129 In this section, we provide additional quantitative results that are not included in the main paper.

130 **Classwise Rendering Quality.** We provide classwise PSNR, SSIM, and LPIPS scores of  
 131 PeRFception-CO3D dataset in Table a.7.

132 **2D and 3D Perception Tasks.** Table a.1 reports the results of the 2D classification experiments. In  
 133 Table a.8, we report the quantitative classification results on PeRFception-CO3D dataset. In Table  
 134 a.11, we report the scenewise semantic segmentation results on PeRFception-ScanNet dataset. For all  
 135 experiments, we perform three experiments with different random seed values and report the mean  
 136 and standard deviation of evaluation metrics.

137 **2D Classification Anlaysis.** We conduct additional 2D classification experiments using the pretrained  
 138 Vision Transformer (ViT) [6] models to show that our PeRFception-CO3D dataset improves the clas-  
 139 sification performance. Similar to our ResNet 2D classification experiments, we train ViT models on

140 either CO3D images or PeRFception renderings and test on the CO3D test split and the PeRFception-  
141 CO3D test split. As reported in the Table a.9, the ViT models trained on the PeRFception-CO3D train  
142 set achieve higher classification accuracy than those trained on the CO3D train set. We conjecture  
143 that the domain gap for ViT models is much smaller, and the data augmentations on PeRFception  
144 made the ViT models to be more robust in real images.

|       | apple  | backp  | ball   | banana | bbb    | bbg    | bench  | bicy    | book      | bottle  | bowl   | brocc   | cake          |
|-------|--------|--------|--------|--------|--------|--------|--------|---------|-----------|---------|--------|---------|---------------|
| PSNR  | 29.56  | 28.99  | 29.06  | 30.62  | 29.21  | 30.03  | 27.01  | 27.67   | 28.88     | 29.85   | 31.83  | 29.67   | 29.02         |
| SSIM  | 0.8767 | 0.8702 | 0.8661 | 0.8951 | 0.8691 | 0.8898 | 0.7883 | 0.8246  | 0.8746    | 0.8671  | 0.8717 | 0.8584  | 0.8695        |
| LPIPS | 0.3263 | 0.3349 | 0.3614 | 0.2591 | 0.3566 | 0.3347 | 0.3471 | 0.3416  | 0.3453    | 0.3110  | 0.3135 | 0.3479  | 0.3452        |
|       | car    | carrot | cellp  | chair  | couch  | cup    | donut  | frisbee | hairdryer | handbag | hotdog | hydrant | kbd           |
| PSNR  | 23.63  | 28.78  | 29.33  | 28.32  | 29.31  | 28.83  | 28.78  | 30.06   | 29.12     | 28.39   | 28.95  | 26.12   | 29.74         |
| SSIM  | 0.7259 | 0.8573 | 0.8603 | 0.8524 | 0.8727 | 0.8628 | 0.8695 | 0.8720  | 0.8706    | 0.8622  | 0.8738 | 0.7428  | 0.8789        |
| LPIPS | 0.4003 | 0.3609 | 0.3511 | 0.3475 | 0.3358 | 0.3602 | 0.3484 | 0.3386  | 0.3351    | 0.3367  | 0.3639 | 0.3416  | 0.3301        |
|       | kite   | laptop | micro  | motor  | mouse  | orange | park   | pizza   | plant     | remote  | sandwc | skb     | stop          |
| PSNR  | 29.04  | 27.99  | 27.75  | 25.61  | 29.04  | 28.55  | 24.69  | 29.00   | 28.63     | 29.23   | 29.00  | 28.57   | 23.48         |
| SSIM  | 0.8693 | 0.8535 | 0.8506 | 0.7772 | 0.8687 | 0.8521 | 0.7420 | 0.8687  | 0.8452    | 0.8667  | 0.8738 | 0.8458  | 0.7234        |
| LPIPS | 0.3293 | 0.3530 | 0.3650 | 0.3641 | 0.3486 | 0.3469 | 0.3835 | 0.3214  | 0.3436    | 0.3668  | 0.3459 | 0.3536  | 0.4121        |
|       | suit   | teddy  | toast  | toil   | tbus   | tplane | ttrain | ttruck  | tv        | umb     | vase   | wine    | overall       |
| PSNR  | 28.87  | 29.39  | 28.05  | 32.61  | 28.15  | 29.30  | 28.42  | 28.63   | 27.69     | 28.62   | 28.47  | 28.13   | <b>28.82</b>  |
| SSIM  | 0.8609 | 0.8713 | 0.8564 | 0.9297 | 0.8549 | 0.8703 | 0.8438 | 0.8627  | 0.8709    | 0.8504  | 0.8536 | 0.8420  | <b>0.8564</b> |
| LPIPS | 0.3526 | 0.3345 | 0.3466 | 0.2841 | 0.3579 | 0.3537 | 0.3765 | 0.3546  | 0.3865    | 0.3601  | 0.3570 | 0.3820  | <b>0.3451</b> |

Table a.7: Classwise rendering quality of PeRFception-CO3D dataset.

Table a.8: Score tables for 3D classification networks. We repeat each experiment for 3 times and report the mean ( $\mu$ ) and standard deviation ( $\sigma$ ). **D** denotes density and **SH** denotes spherical harmonic coefficients.

| Acc@1 ( $\mu \pm \sigma$ ) |                  |                  |                  |                  |
|----------------------------|------------------|------------------|------------------|------------------|
| Input Feature              | None             | <b>D</b>         | <b>SH</b>        | <b>SH + D</b>    |
| 3DResNet14                 | 59.36 $\pm$ 0.30 | 72.44 $\pm$ 0.29 | 71.87 $\pm$ 0.61 | 72.92 $\pm$ 0.42 |
| 3DResNet18                 | 63.85 $\pm$ 0.33 | 75.18 $\pm$ 0.70 | 75.58 $\pm$ 0.37 | 75.72 $\pm$ 0.25 |
| 3DResNet34                 | 64.55 $\pm$ 0.84 | 76.38 $\pm$ 0.34 | 76.51 $\pm$ 0.61 | 76.50 $\pm$ 0.03 |
| 3DResNet50                 | 65.25 $\pm$ 0.75 | 76.42 $\pm$ 0.19 | 77.59 $\pm$ 0.17 | 77.53 $\pm$ 0.27 |
| 3DResNet101                | 66.21 $\pm$ 0.93 | 77.27 $\pm$ 0.61 | 78.04 $\pm$ 0.58 | 77.19 $\pm$ 0.89 |
| Acc@5 ( $\mu \pm \sigma$ ) |                  |                  |                  |                  |
| Input Feature              | None             | <b>D</b>         | <b>SH</b>        | <b>SH + D</b>    |
| 3DResNet14                 | 81.30 $\pm$ 0.87 | 90.04 $\pm$ 0.13 | 89.60 $\pm$ 0.36 | 90.83 $\pm$ 0.03 |
| 3DResNet18                 | 84.47 $\pm$ 0.54 | 91.10 $\pm$ 0.24 | 90.98 $\pm$ 0.40 | 91.54 $\pm$ 0.21 |
| 3DResNet34                 | 84.26 $\pm$ 0.47 | 91.79 $\pm$ 0.61 | 91.79 $\pm$ 0.49 | 91.98 $\pm$ 0.08 |
| 3DResNet50                 | 85.71 $\pm$ 0.64 | 92.91 $\pm$ 0.24 | 92.73 $\pm$ 0.21 | 92.93 $\pm$ 0.54 |
| 3DResNet101                | 86.50 $\pm$ 0.09 | 92.68 $\pm$ 0.34 | 93.24 $\pm$ 0.49 | 93.09 $\pm$ 0.21 |

Table a.9: 2D classification accuracies (Acc@1) of the ImageNet [2] pretrained ViT model trained either on CO3D or PeRFception-CO3D and evaluated either on CO3D or PeRFception-CO3D. PeRF-CO3D is an abbreviation of PeRFception-CO3D.  $p$  stands for the probability to apply background augmentation.

| Train Dataset | CO3D  |           | PeRF-CO3D (p=0.5) |           |
|---------------|-------|-----------|-------------------|-----------|
| Test Dataset  | CO3D  | PeRF-CO3D | CO3D              | PeRF-CO3D |
| ViT/S-16      | 87.61 | 83.80     | 87.64             | 86.54     |
| ViT/L-16      | 88.30 | 84.90     | 88.65             | 87.59     |

Table a.10: Evaluated semantic segmentation performance on PeRFception-ScanNet dataset without (left) and with (right) spherical harmonic coefficients as input feature. **D** denotes density and **SH** denotes spherical harmonic coefficients.

| Input Feature      | mIoU (%) |              |              |               | mAcc (%) |              |              |               |
|--------------------|----------|--------------|--------------|---------------|----------|--------------|--------------|---------------|
|                    | None     | <b>D</b>     | <b>SH</b>    | <b>SH + D</b> | None     | <b>D</b>     | <b>SH</b>    | <b>SH + D</b> |
| 3DRes16UNet14A [5] | 65.83    | <u>65.88</u> | 66.01        | <b>66.41</b>  | 74.41    | 74.19        | <u>74.49</u> | <b>75.19</b>  |
| 3DRes16UNet18A [5] | 66.78    | <u>67.67</u> | <u>68.15</u> | <b>68.25</b>  | 75.45    | 76.54        | <u>76.91</u> | <b>77.46</b>  |
| 3DRes16UNet34C [5] | 67.82    | <u>68.79</u> | 68.42        | <b>69.17</b>  | 76.31    | <u>77.28</u> | 77.10        | <b>77.85</b>  |
| FPT (5cm) [7]      | 67.16    | <u>67.99</u> | 67.42        | <b>68.35</b>  | 74.57    | <b>77.35</b> | 76.61        | <u>77.22</u>  |

## 145 A.7 Qualitative Results

146 We provide additional qualitative results introduced in the main paper. Figure a.5 illustrates several  
 147 examples of PeRFception-CO3D with accurate geometric information and photorealistic rendering  
 148 quality. Figure a.6, a.7 and a.8 compare visual reconstruction ability of CO3D and PeRFception-  
 149 CO3D. Figure a.9, a.10, and a.11 visualize rendered novel views and their corresponding error maps.  
 150 In Figure a.12, we provide the qualitative results of rendered novel views and their corresponding  
 151 error maps on PeRFception-ScanNet dataset. Figure a.13 visualizes reconstructed sparse voxels of  
 152 PeRFception-ScanNet with predicted semantic labels. We have attached an additional video to show  
 153 our photorealistic rendering.

Table a.11: Scenewise statistics of semantic segmentation networks on the PeRFception-ScanNet validation split. All experiments are performed with three different random seed values and the mean and standard deviation are reported.

| IoU | D | SH | bath     | bed      | bksf     | cab      | chair    | cntr     | curt     | desk     | door     | floor    |
|-----|---|----|----------|----------|----------|----------|----------|----------|----------|----------|----------|----------|
| 14A |   |    | 88.7±0.8 | 79.6±0.3 | 63.7±1.3 | 60.8±1.0 | 86.5±0.5 | 52.0±1.5 | 59.3±1.7 | 62.9±1.4 | 43.9±0.6 | 94.8±0.0 |
| 14A | ✓ |    | 86.6±0.5 | 77.1±1.0 | 64.1±0.9 | 59.4±0.5 | 86.9±0.5 | 48.5±5.6 | 53.9±1.7 | 63.1±1.1 | 54.5±1.1 | 94.6±0.1 |
| 14A |   | ✓  | 88.3±1.1 | 79.1±1.2 | 64.5±0.4 | 60.8±0.4 | 86.6±0.4 | 51.1±0.8 | 49.9±2.0 | 65.7±0.7 | 50.8±0.9 | 94.8±0.0 |
| 14A | ✓ | ✓  | 87.5±0.2 | 78.4±0.4 | 63.1±1.1 | 59.4±0.7 | 86.8±0.4 | 53.0±3.1 | 53.0±1.9 | 63.7±0.3 | 54.9±1.3 | 94.7±0.0 |
| 18A |   |    | 89.3±0.4 | 80.2±0.7 | 65.3±1.1 | 59.6±0.8 | 87.2±0.7 | 50.8±2.0 | 58.1±0.7 | 63.5±0.5 | 45.0±1.3 | 94.9±0.1 |
| 18A | ✓ |    | 86.6±0.3 | 79.1±0.7 | 68.1±2.1 | 60.4±1.1 | 85.6±0.8 | 51.9±0.8 | 55.7±1.1 | 64.9±0.6 | 57.1±0.7 | 94.6±0.2 |
| 18A |   | ✓  | 87.6±0.9 | 79.2±1.1 | 66.5±1.0 | 61.6±0.8 | 87.7±0.3 | 53.5±1.7 | 51.1±3.2 | 63.6±0.7 | 55.7±0.3 | 94.9±0.0 |
| 18A | ✓ | ✓  | 86.8±0.5 | 78.1±1.1 | 68.1±0.5 | 62.3±0.8 | 87.5±0.3 | 53.0±0.4 | 54.9±2.7 | 61.4±0.7 | 58.9±0.1 | 94.9±0.1 |
| 34C |   |    | 88.6±0.4 | 79.0±0.8 | 65.2±1.4 | 61.3±1.0 | 87.5±0.3 | 53.7±0.9 | 62.1±2.7 | 63.0±0.3 | 48.7±1.1 | 94.9±0.0 |
| 34C | ✓ |    | 87.8±0.9 | 78.3±0.8 | 69.1±2.3 | 62.8±1.3 | 88.1±0.3 | 54.2±4.3 | 58.0±2.2 | 64.9±0.7 | 58.2±1.2 | 94.9±0.0 |
| 34C |   | ✓  | 89.3±0.6 | 80.7±0.9 | 66.7±0.1 | 63.2±1.6 | 88.5±0.5 | 56.9±3.2 | 58.7±2.2 | 65.1±2.2 | 55.3±0.7 | 94.9±0.0 |
| 34C | ✓ | ✓  | 88.0±0.7 | 80.1±1.1 | 68.2±1.8 | 62.6±0.9 | 87.9±0.3 | 55.7±1.8 | 61.7±1.2 | 64.9±0.2 | 58.7±0.9 | 94.9±0.1 |
| IoU | D | SH | othr     | pic      | ref      | show     | sink     | sofa     | tab      | toil     | wall     | wind     |
| 14A |   |    | 47.0±0.6 | 10.9±0.7 | 57.3±1.0 | 62.0±0.5 | 75.0±0.3 | 79.7±1.2 | 65.9±0.8 | 92.2±0.9 | 80.8±0.1 | 55.7±0.2 |
| 14A | ✓ |    | 46.6±1.2 | 21.1±1.0 | 59.0±2.3 | 55.3±1.4 | 73.0±0.5 | 79.9±1.5 | 67.2±1.6 | 92.3±0.8 | 82.7±0.3 | 58.0±0.7 |
| 14A |   | ✓  | 47.1±1.5 | 16.9±2.2 | 60.1±1.0 | 65.4±0.8 | 74.1±0.8 | 77.8±1.3 | 68.0±0.5 | 91.8±0.9 | 81.9±0.6 | 57.8±0.9 |
| 14A | ✓ | ✓  | 45.0±2.1 | 21.5±0.8 | 56.8±2.1 | 57.6±1.7 | 73.6±0.8 | 79.6±1.3 | 67.3±0.6 | 92.6±0.1 | 82.7±0.4 | 59.1±1.4 |
| 18A |   |    | 47.8±0.5 | 13.4±0.1 | 60.2±0.5 | 68.9±1.7 | 75.5±0.7 | 80.0±1.6 | 65.4±1.4 | 93.3±1.4 | 81.4±0.2 | 58.9±0.5 |
| 18A | ✓ |    | 48.3±0.2 | 21.4±0.6 | 61.0±0.7 | 63.5±1.6 | 71.6±2.2 | 79.8±1.5 | 66.9±1.8 | 92.0±1.4 | 83.5±0.0 | 60.9±1.3 |
| 18A |   | ✓  | 49.6±1.5 | 21.3±0.8 | 60.6±2.4 | 71.0±2.4 | 73.9±0.6 | 80.2±0.6 | 66.2±0.8 | 93.7±0.0 | 83.5±0.1 | 61.5±0.9 |
| 18A | ✓ | ✓  | 49.7±0.5 | 22.2±0.2 | 60.0±0.7 | 62.6±0.9 | 74.0±0.2 | 81.5±1.5 | 66.3±0.3 | 92.7±0.6 | 84.0±0.3 | 62.4±0.7 |
| 34C |   |    | 48.4±0.8 | 13.9±0.3 | 61.5±1.1 | 71.0±0.8 | 75.2±0.2 | 82.2±0.8 | 65.6±0.3 | 93.4±0.5 | 81.8±0.3 | 60.0±1.8 |
| 34C | ✓ |    | 46.3±0.6 | 23.6±1.9 | 63.6±1.2 | 66.1±0.3 | 73.3±0.5 | 81.8±1.0 | 67.1±0.5 | 91.9±0.5 | 84.0±0.1 | 61.6±0.9 |
| 34C |   | ✓  | 49.2±0.6 | 21.5±0.9 | 64.1±3.5 | 72.8±0.9 | 73.7±1.1 | 80.9±1.1 | 66.4±1.1 | 92.5±0.7 | 83.5±0.0 | 59.4±1.0 |
| 34C | ✓ | ✓  | 48.4±1.1 | 22.1±1.5 | 63.1±2.0 | 67.5±1.2 | 73.4±1.1 | 79.9±0.6 | 65.0±1.0 | 92.3±1.2 | 84.5±0.1 | 63.1±1.5 |
| Acc | D | SH | bath     | bed      | bksf     | cab      | chair    | cntr     | curt     | desk     | door     | floor    |
| 14A |   |    | 91.9±1.2 | 85.4±0.4 | 79.4±0.9 | 75.2±0.2 | 92.0±0.7 | 61.8±1.3 | 69.1±0.6 | 80.1±2.3 | 53.2±0.7 | 98.4±0.0 |
| 14A | ✓ |    | 89.5±0.5 | 81.9±1.3 | 80.0±0.9 | 74.4±1.4 | 91.7±0.4 | 57.4±8.7 | 61.5±0.6 | 80.0±3.1 | 63.7±1.7 | 98.2±0.1 |
| 14A |   | ✓  | 91.7±1.3 | 84.3±0.8 | 78.2±1.4 | 75.6±0.6 | 91.0±0.3 | 63.4±0.5 | 61.5±1.4 | 81.2±1.2 | 60.9±1.5 | 98.2±0.1 |
| 14A | ✓ | ✓  | 91.4±0.2 | 83.5±0.3 | 78.3±2.8 | 74.7±1.6 | 91.1±0.2 | 63.3±3.7 | 62.8±1.0 | 80.7±0.5 | 65.1±1.7 | 98.3±0.0 |
| 18A |   |    | 92.8±0.2 | 86.3±0.2 | 79.6±2.0 | 76.4±0.9 | 92.4±0.6 | 62.5±2.8 | 72.2±0.9 | 81.5±1.9 | 54.2±2.8 | 98.1±0.1 |
| 18A | ✓ |    | 89.7±0.3 | 83.1±0.4 | 80.7±0.4 | 71.9±4.5 | 89.0±2.3 | 61.5±0.4 | 66.2±0.1 | 82.3±1.4 | 69.3±0.9 | 98.3±0.1 |
| 18A |   | ✓  | 91.4±0.7 | 84.2±0.4 | 79.9±0.8 | 76.6±1.5 | 92.5±0.3 | 64.9±3.2 | 62.7±1.8 | 83.6±1.0 | 66.2±0.5 | 98.2±0.0 |
| 18A | ✓ | ✓  | 90.3±1.4 | 82.4±1.0 | 81.4±0.3 | 78.6±1.0 | 92.4±0.3 | 62.6±0.2 | 68.1±3.1 | 81.1±2.3 | 71.7±0.5 | 98.2±0.0 |
| 34C |   |    | 92.8±1.1 | 85.1±0.5 | 80.2±1.9 | 76.2±2.0 | 93.0±0.5 | 63.8±0.8 | 72.6±2.2 | 81.1±1.6 | 58.7±1.0 | 98.2±0.0 |
| 34C | ✓ |    | 91.0±1.1 | 82.7±1.3 | 83.0±1.0 | 77.1±1.2 | 92.2±0.2 | 63.4±5.0 | 69.7±3.3 | 81.9±1.5 | 69.0±2.0 | 98.3±0.0 |
| 34C |   | ✓  | 92.8±0.8 | 85.6±0.4 | 80.3±2.9 | 78.0±1.4 | 92.9±0.4 | 68.3±3.1 | 69.0±1.3 | 83.7±0.6 | 66.7±1.5 | 98.3±0.0 |
| 34C | ✓ | ✓  | 91.5±1.1 | 84.5±0.9 | 83.2±1.8 | 76.9±0.9 | 92.3±0.2 | 66.7±2.0 | 70.9±1.7 | 82.6±0.2 | 68.9±1.2 | 98.3±0.0 |
| Acc | D | SH | othr     | pic      | ref      | show     | sink     | sofa     | tab      | toil     | wall     | wind     |
| 14A |   |    | 54.2±0.7 | 11.8±0.5 | 64.6±1.1 | 70.0±0.9 | 82.6±0.7 | 90.0±0.5 | 76.9±0.4 | 95.2±0.4 | 94.4±0.1 | 64.9±0.5 |
| 14A | ✓ |    | 54.2±1.9 | 24.4±1.5 | 66.4±2.8 | 62.7±1.2 | 81.4±1.7 | 90.0±0.7 | 77.2±0.8 | 94.4±1.2 | 95.4±0.3 | 70.0±2.2 |
| 14A |   | ✓  | 55.2±2.8 | 19.4±2.5 | 66.0±1.3 | 73.0±0.8 | 80.5±1.1 | 89.5±0.7 | 78.8±1.3 | 94.1±1.2 | 94.8±0.1 | 68.2±1.0 |
| 14A | ✓ | ✓  | 52.4±2.1 | 25.4±0.7 | 67.7±0.8 | 64.7±1.3 | 81.3±0.6 | 90.0±0.1 | 78.0±0.6 | 94.3±0.3 | 95.1±0.3 | 68.4±1.9 |
| 18A |   |    | 55.4±1.3 | 15.1±0.2 | 66.2±0.5 | 75.9±1.9 | 83.3±1.8 | 89.7±0.7 | 75.9±2.3 | 95.8±0.6 | 94.2±0.3 | 67.9±0.2 |
| 18A | ✓ |    | 56.2±0.1 | 25.0±1.7 | 69.8±1.5 | 71.6±3.9 | 84.1±0.6 | 90.3±0.3 | 79.0±1.0 | 96.9±1.9 | 95.4±0.7 | 70.7±0.6 |
| 18A |   | ✓  | 56.5±1.6 | 24.0±0.8 | 68.2±0.6 | 77.4±2.8 | 81.3±1.3 | 89.3±1.6 | 77.4±1.4 | 95.2±0.1 | 94.9±0.0 | 71.8±0.3 |
| 18A | ✓ | ✓  | 56.2±0.9 | 27.8±0.6 | 69.7±1.7 | 68.6±0.8 | 82.0±1.2 | 90.0±0.9 | 76.6±2.1 | 95.1±0.2 | 94.7±0.1 | 71.4±0.6 |
| 34C |   |    | 55.9±1.6 | 15.2±0.1 | 69.5±1.3 | 78.1±0.5 | 83.2±1.1 | 90.5±0.5 | 77.2±0.5 | 96.0±0.2 | 94.4±0.3 | 67.8±3.1 |
| 34C | ✓ |    | 52.7±1.1 | 28.7±2.0 | 72.7±0.3 | 72.4±0.3 | 82.4±0.7 | 90.6±0.2 | 79.5±0.7 | 95.6±0.5 | 95.3±0.2 | 71.6±1.2 |
| 34C |   | ✓  | 55.7±1.3 | 25.2±1.0 | 70.7±2.6 | 79.6±0.6 | 81.1±2.4 | 89.5±0.4 | 78.1±2.8 | 95.3±0.2 | 94.5±0.3 | 71.4±1.7 |
| 34C | ✓ | ✓  | 54.7±2.0 | 27.6±1.9 | 72.8±1.1 | 73.9±1.3 | 81.7±1.9 | 91.0±0.6 | 76.5±1.2 | 95.4±0.3 | 95.3±0.1 | 74.1±1.4 |



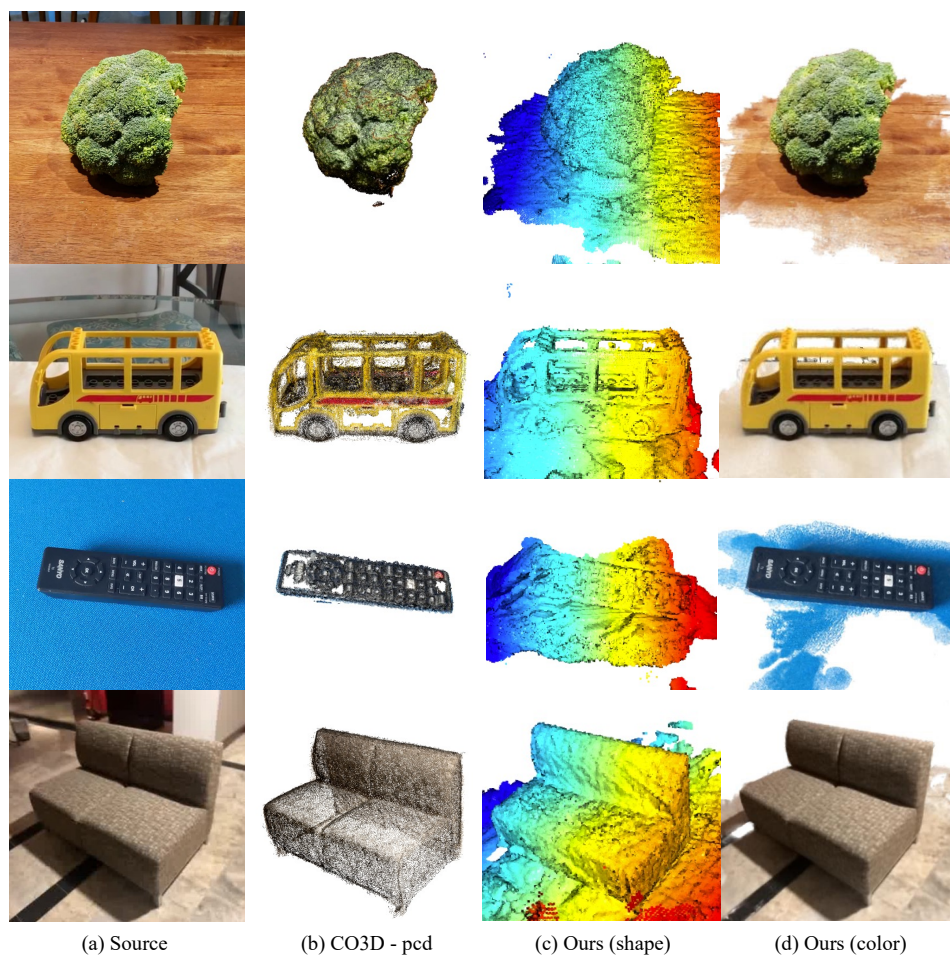

Figure a.5: Visualization of a few example data of original CO3D and PeRFception-CO3D.

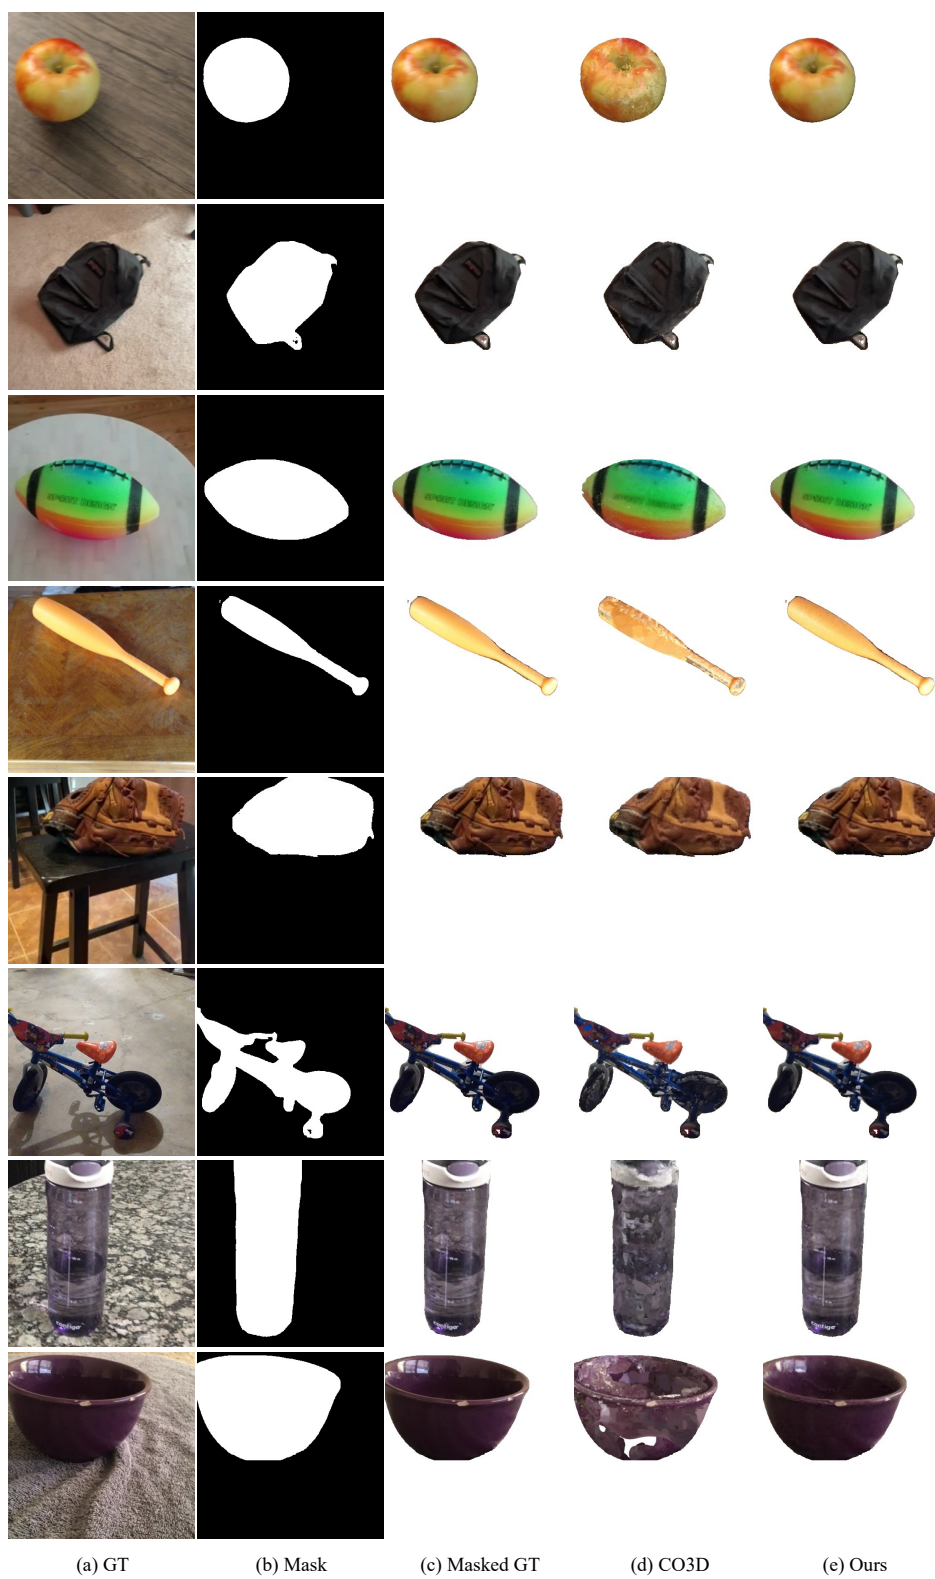

Figure a.6: Comparing visual reconstruction quality of original CO3D and PeRFception-CO3D.

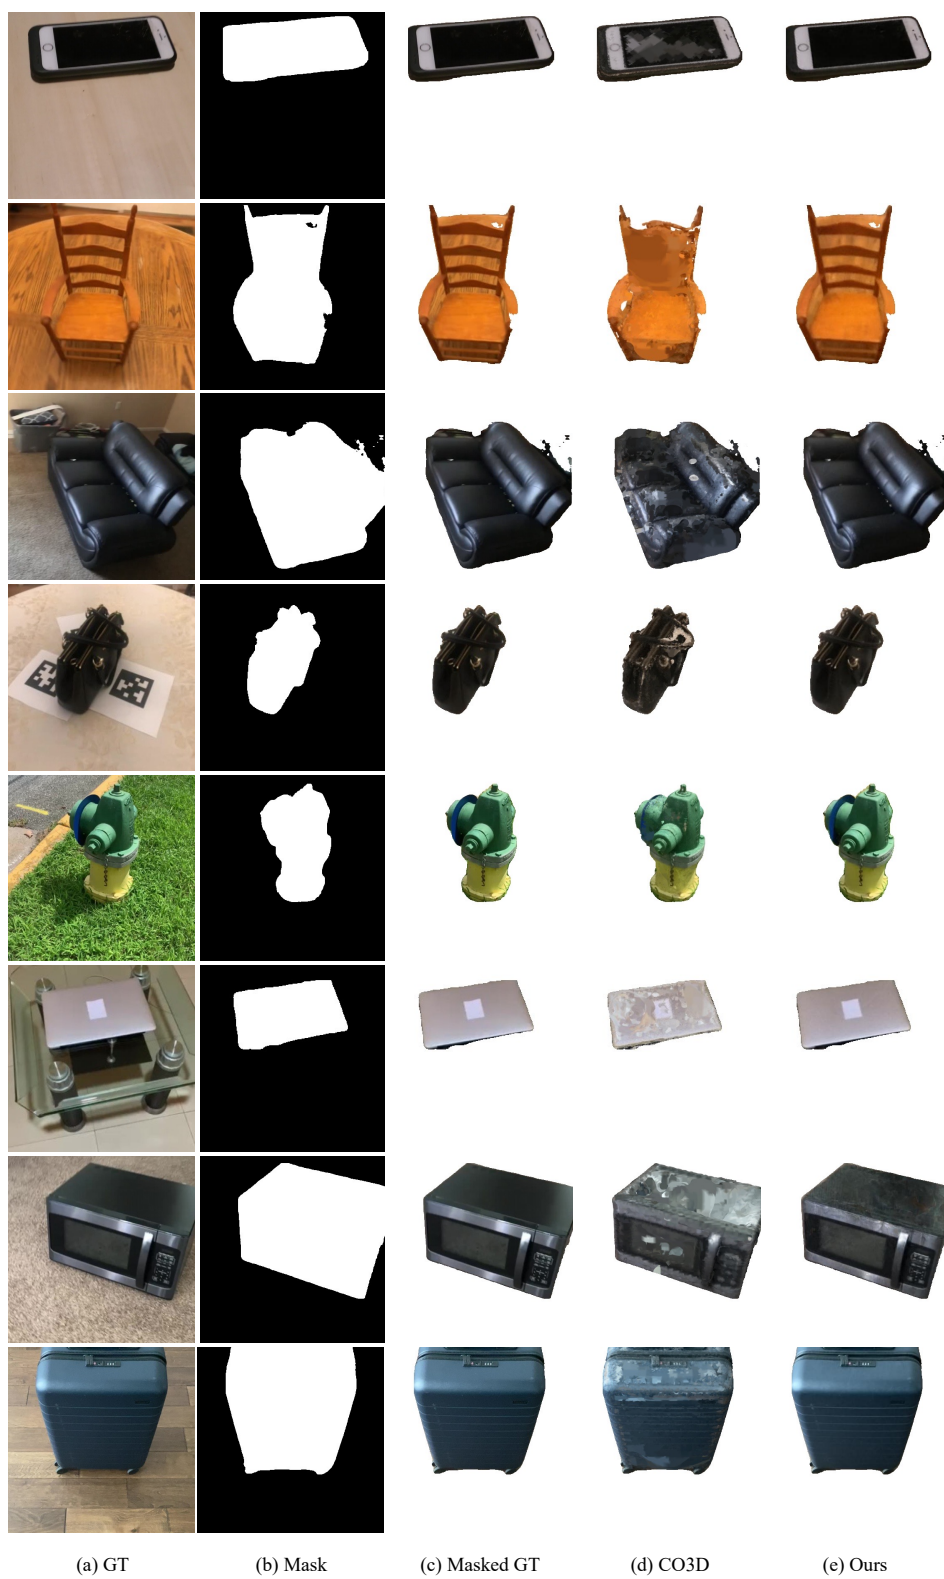

Figure a.7: Comparing visual reconstruction quality of original Co3D and PeRFception-Co3D.

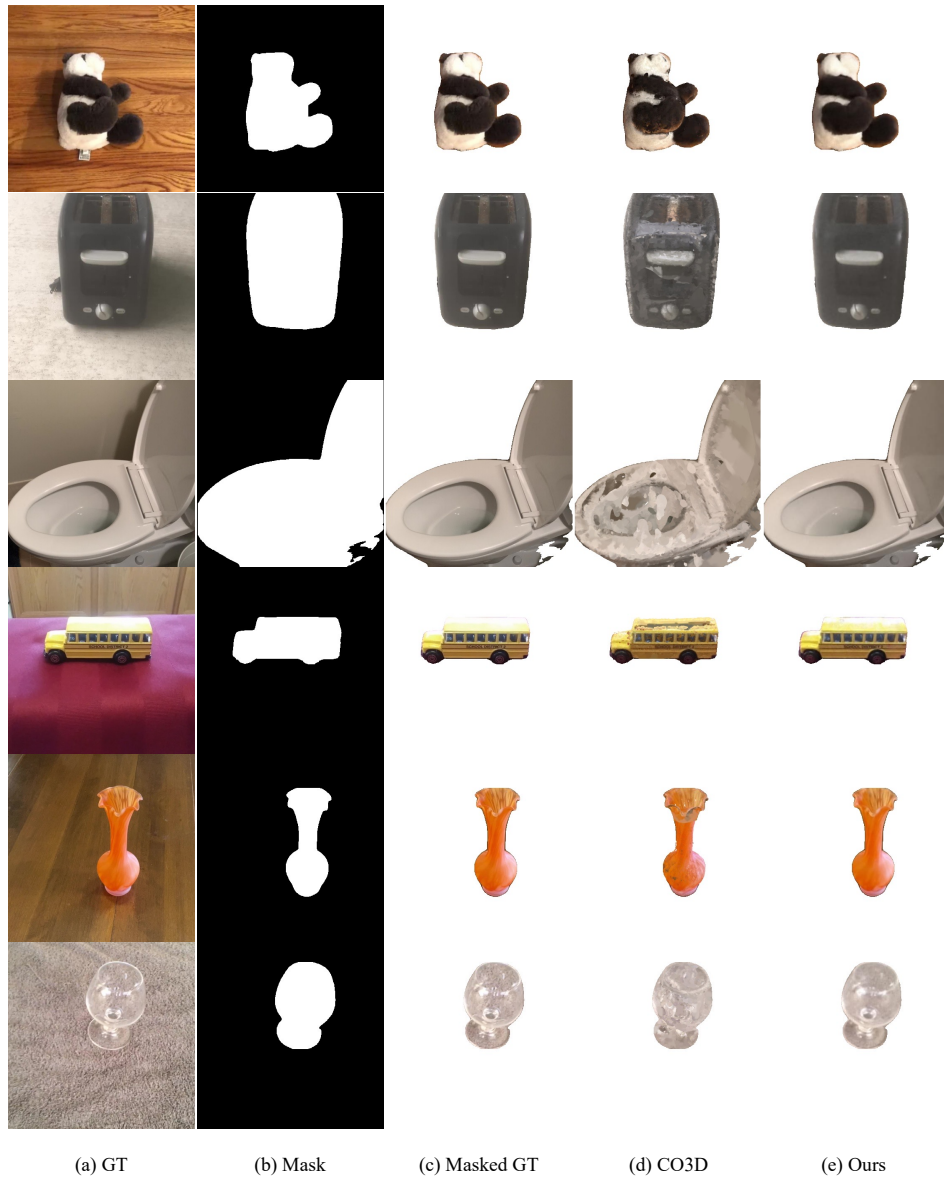

Figure a.8: Comparing visual reconstruction quality of original Co3D and PeRFception-Co3D.



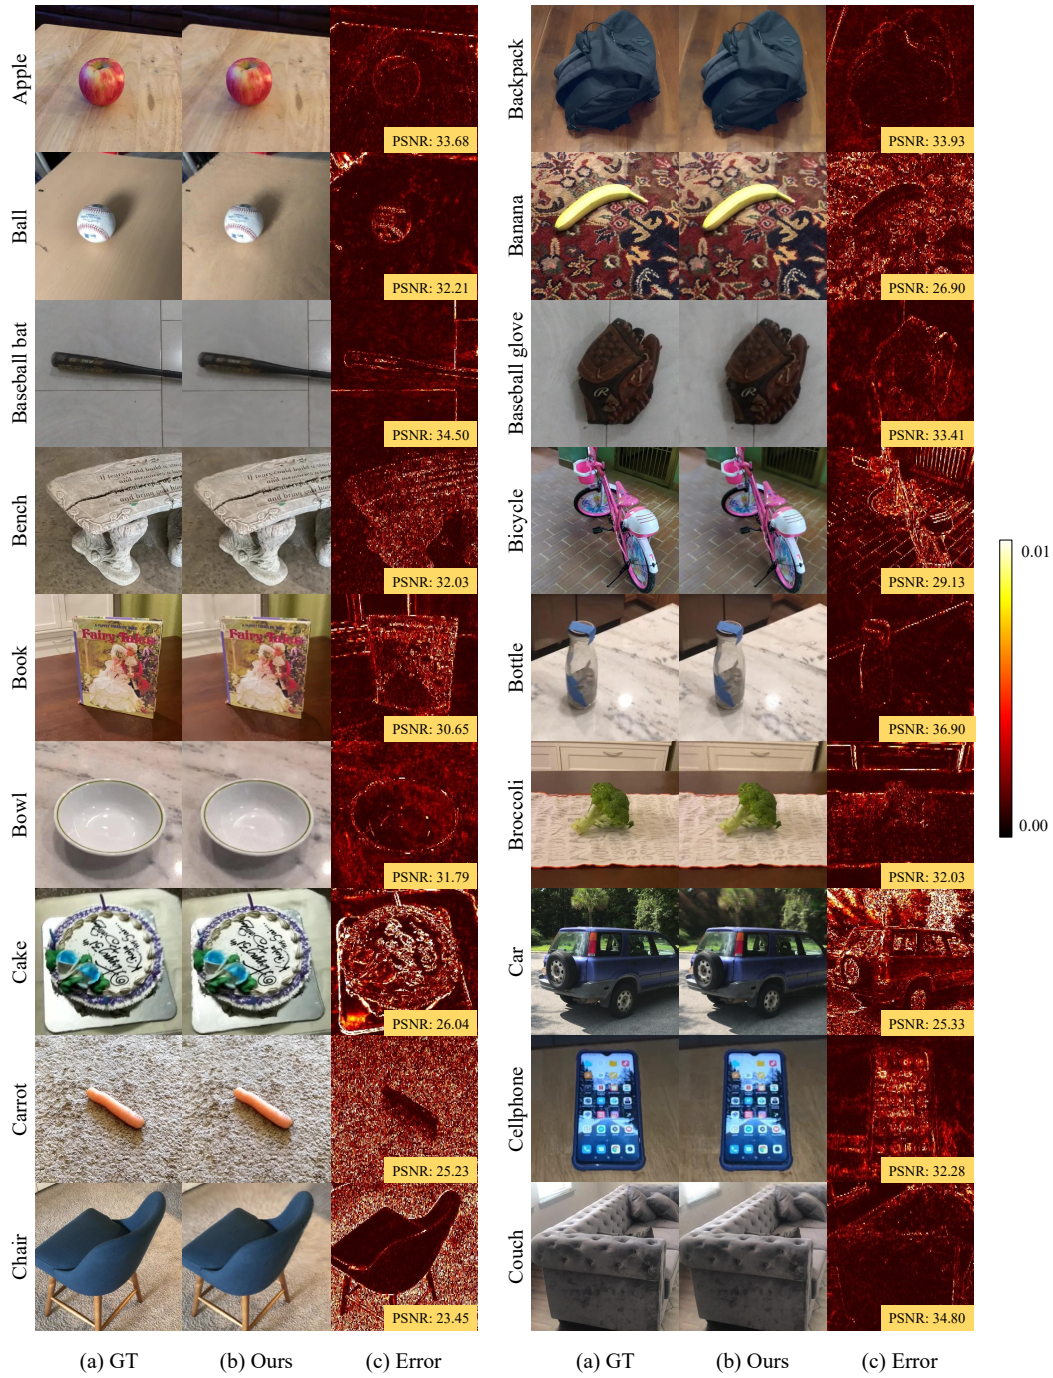

Figure a.9: Rendered class-wise novel views of PerFception-CO3D. The number in error maps denote the estimated PSNR.

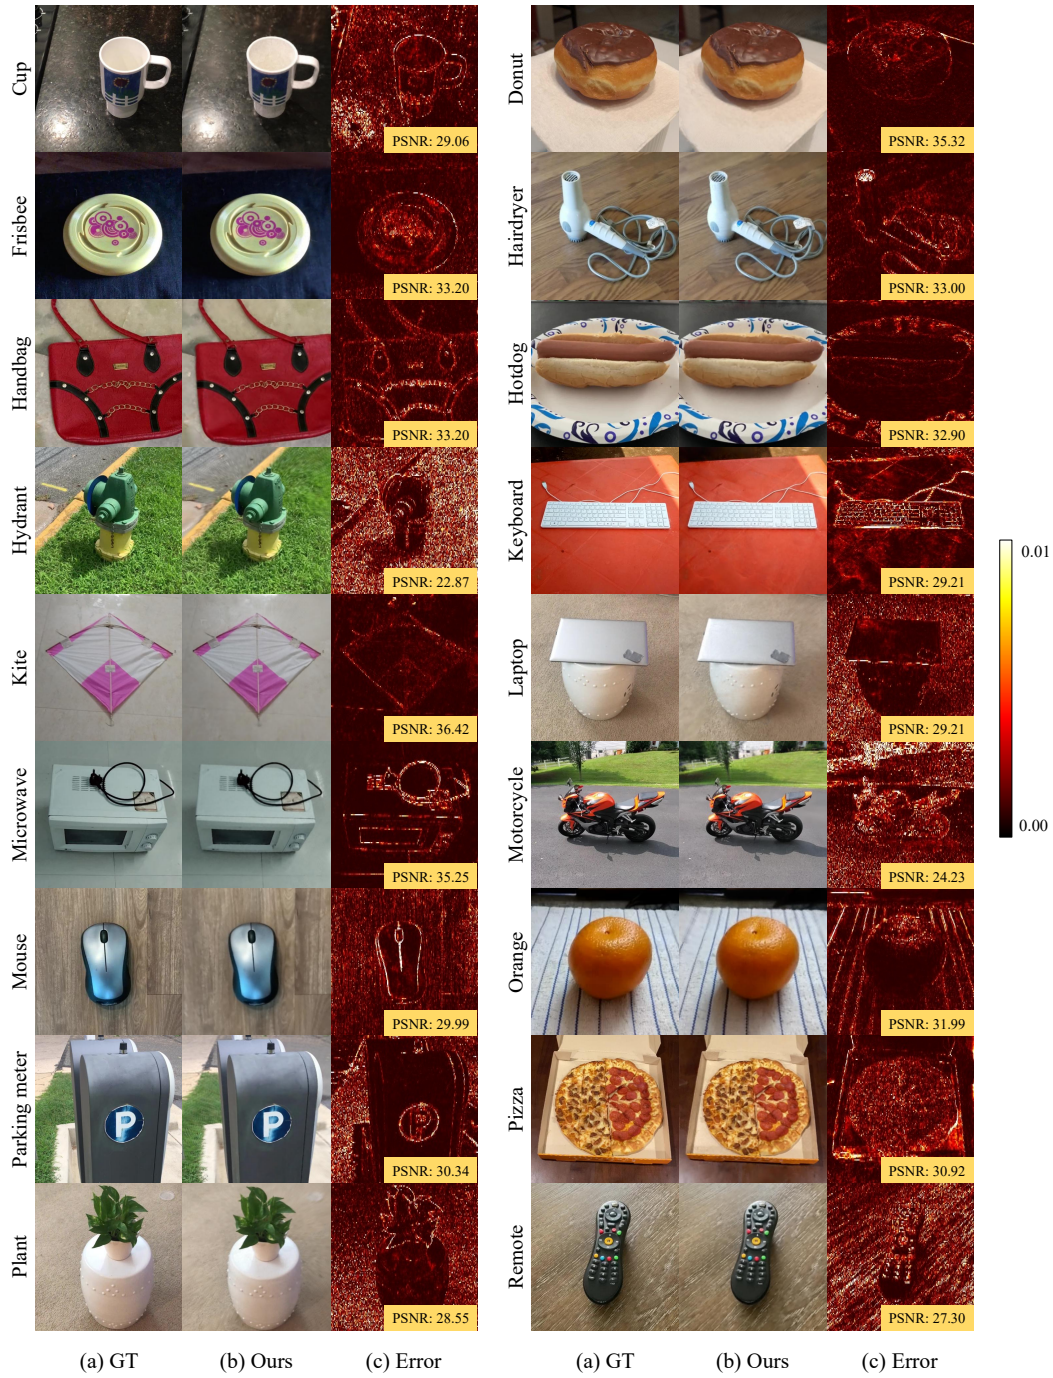

Figure a.10: Rendered class-wise novel views of PerFception-CO3D. The number in error maps denote the estimated PSNR.



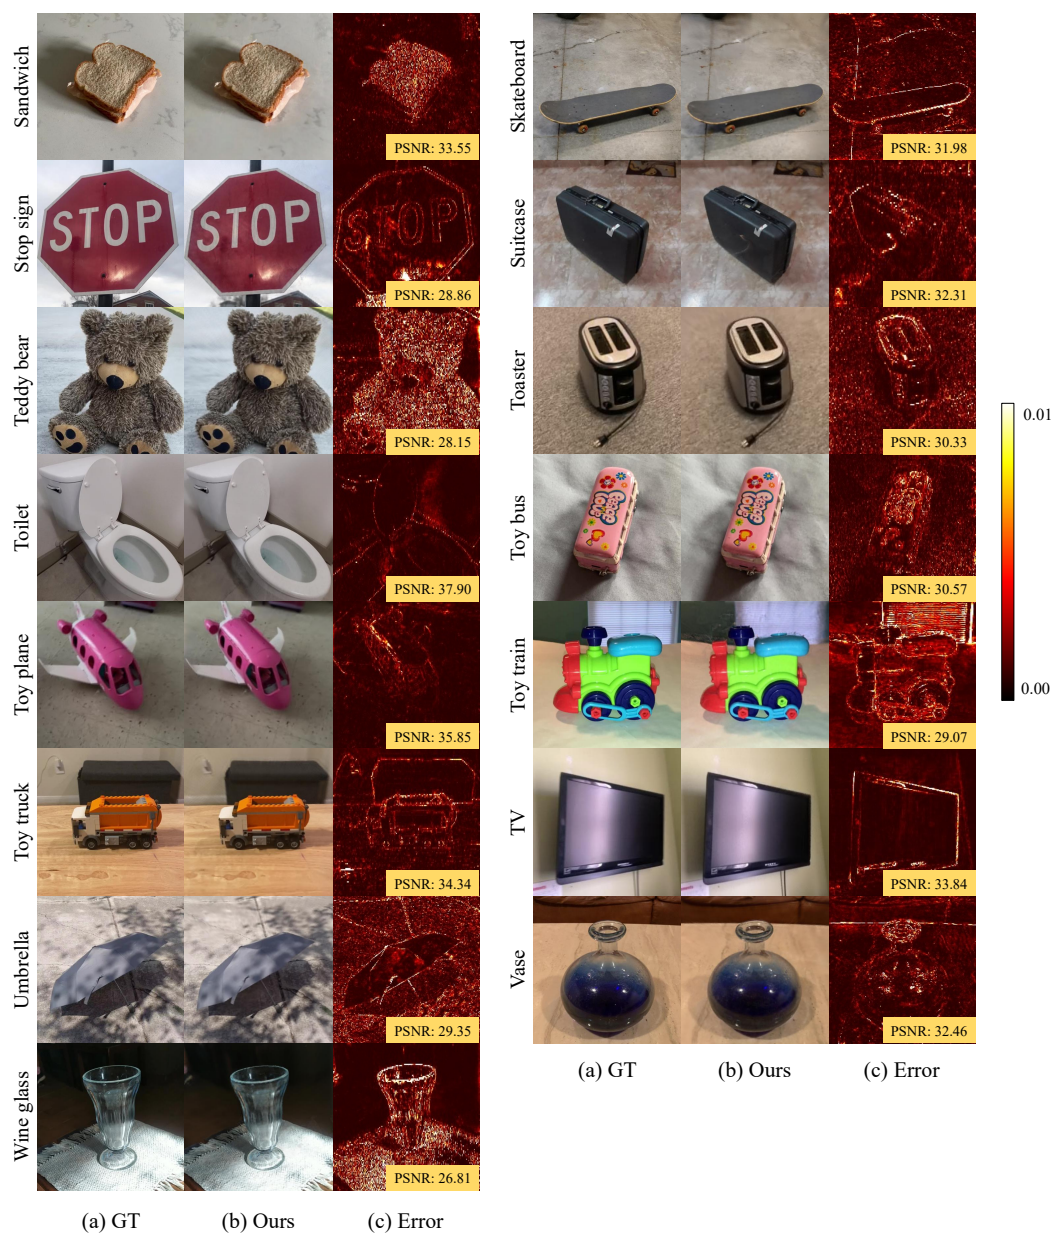

Figure a.11: Rendered class-wise novel views of PerFception-CO3D. The number in error maps denote the estimated PSNR.

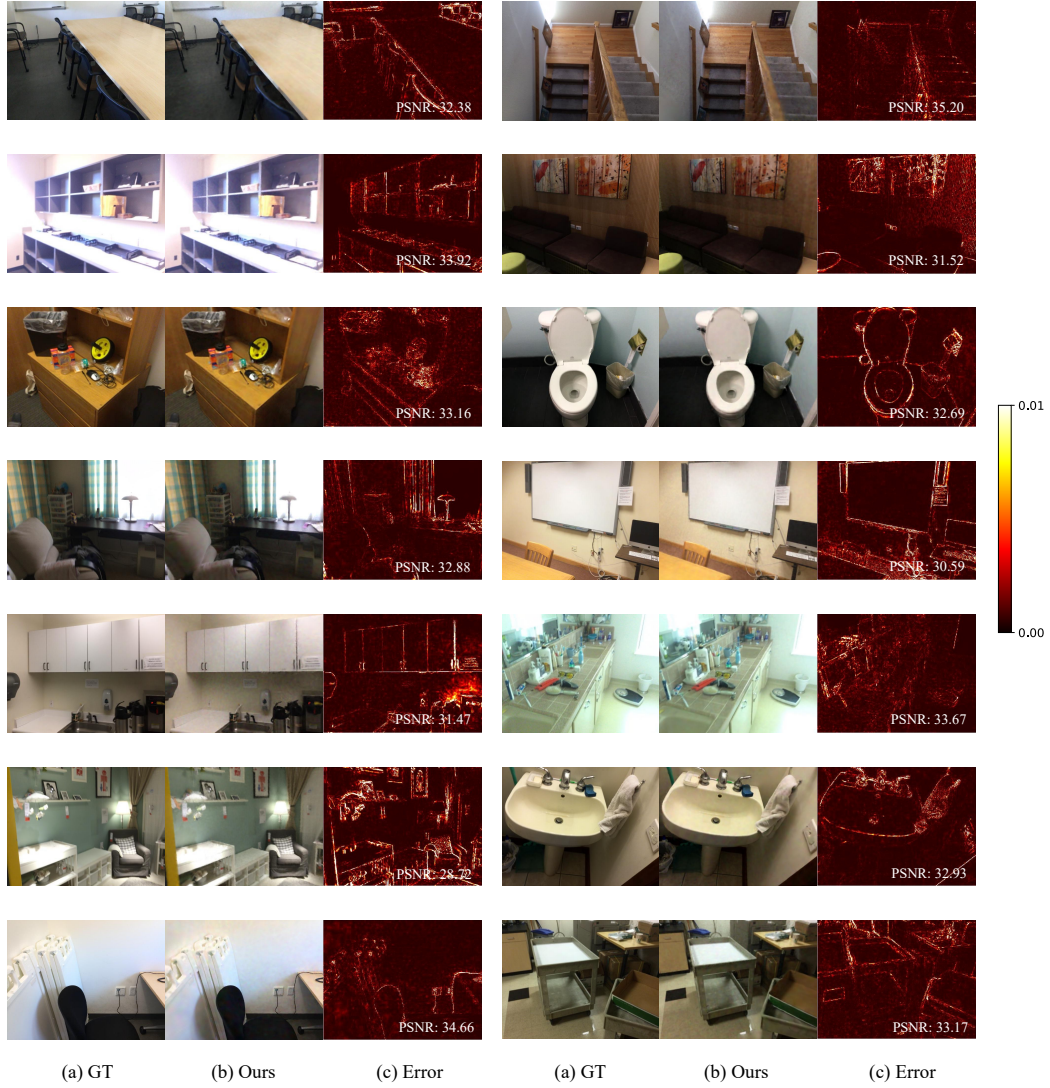

Figure a.12: Rendered class-wise novel views of PerFception-ScanNet. The number in error maps denote the estimated PSNR



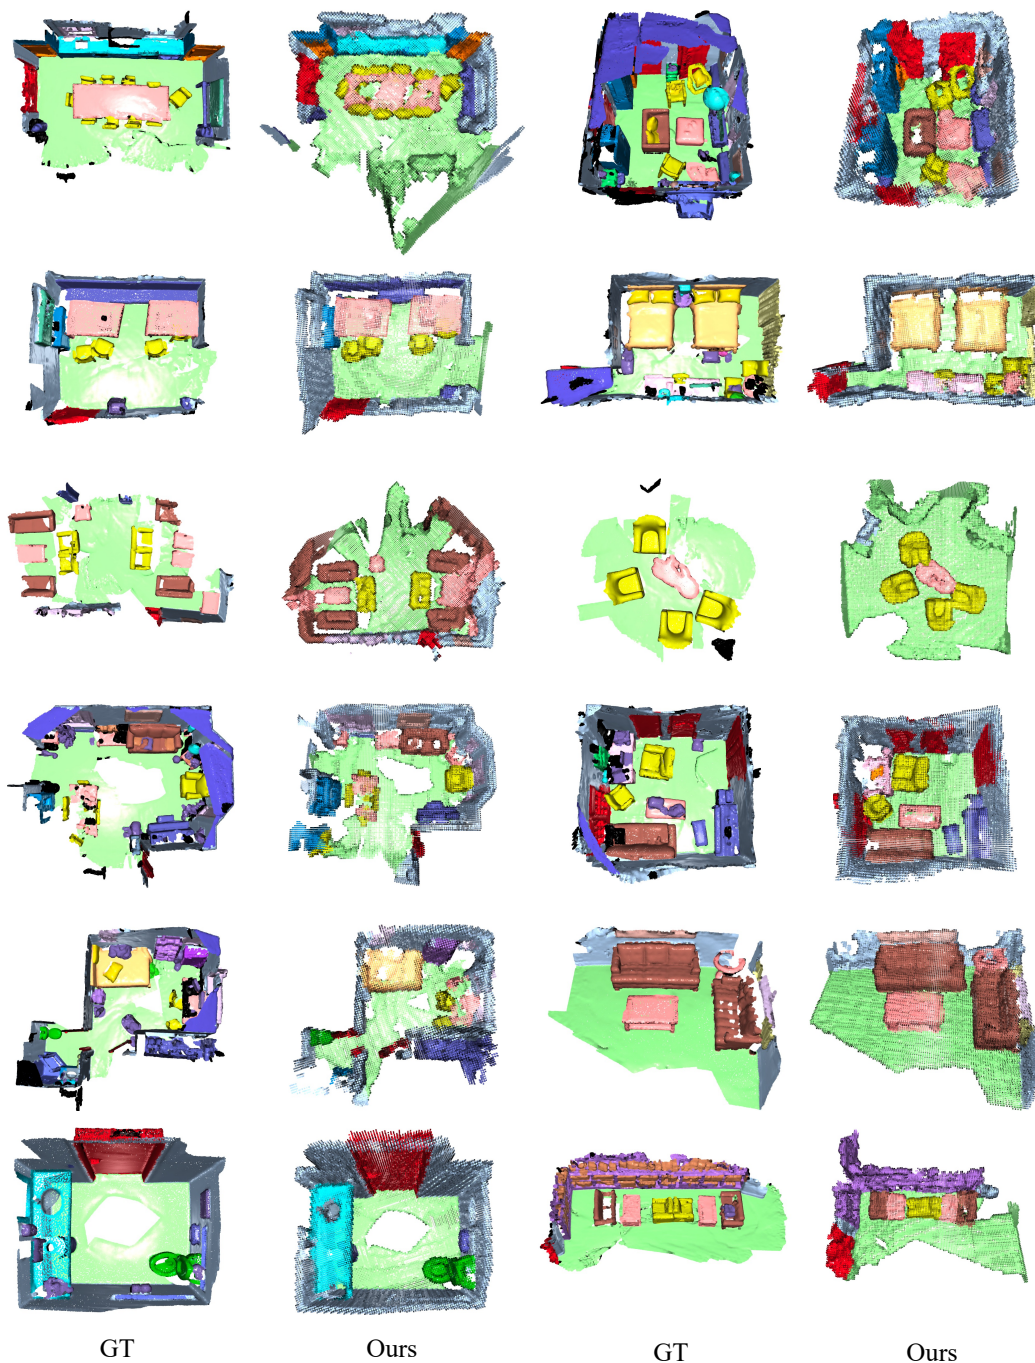

Figure a.13: Qualitative results of semantic segmentation on PeRFception-ScanNet dataset. (1st, 3rd columns) Ground truth point cloud with ground truth semantic labels, (2nd, 4th columns) Reconstructed sparse voxels with predicted semantic labels

## References

- [1] Aditya Chattopadhyay, Anirban Sarkar, Prantik Howlader, and Vineeth N Balasubramanian. Grad-cam++: Generalized gradient-based visual explanations for deep convolutional networks. In *2018 IEEE winter conference on applications of computer vision (WACV)*, pages 839–847. IEEE, 2018.
- [2] Jia Deng, Wei Dong, Richard Socher, Li-Jia Li, Kai Li, and Li Fei-Fei. Imagenet: A large-scale hierarchical image database. In *2009 IEEE conference on computer vision and pattern recognition*, pages 248–255. Ieee, 2009.
- [3] Alex Yu, Sara Fridovich-Keil, Matthew Tancik, Qinhong Chen, Benjamin Recht, and Angjoo Kanazawa. Plenoxels: Radiance fields without neural networks. *arXiv preprint arXiv:2112.05131*, 2021.
- [4] Arno Knapitsch, Jaesik Park, Qian-Yi Zhou, and Vladlen Koltun. Tanks and temples: Benchmarking large-scale scene reconstruction. *ACM Transactions on Graphics (ToG)*, 36(4):1–13, 2017.
- [5] Christopher Choy, JunYoung Gwak, and Silvio Savarese. 4d spatio-temporal convnets: Minkowski convolutional neural networks. In *Proceedings of the IEEE/CVF Conference on Computer Vision and Pattern Recognition*, pages 3075–3084, 2019.
- [6] Alexey Dosovitskiy, Lucas Beyer, Alexander Kolesnikov, Dirk Weissenborn, Xiaohua Zhai, Thomas Unterthiner, Mostafa Dehghani, Matthias Minderer, Georg Heigold, Sylvain Gelly, et al. An image is worth 16x16 words: Transformers for image recognition at scale. *arXiv preprint arXiv:2010.11929*, 2020.
- [7] Chunghyun Park, Yoonwoo Jeong, Minsu Cho, and Jaesik Park. Fast Point Transformer. In *Proceedings of the IEEE/CVF Conference on Computer Vision and Pattern Recognition (CVPR)*, 2022.
