# Supplementary material
Source: ML conference proceedings conference paper supplement (https://openreview.net/forum?id=MzaPEKHv-0J)
Supplement: supplementary_material [file attachment]

## 1    **A    Instructions**

### 2    **A.1    PeRFception**

#### 3    **A.1.1    PeRFception format**

4    Each checkpoint is composed of following components:

- 5        1. class\_info: "class"
- 6        2. label\_info.npz: rendered intrinsics, extrinsics, and extra metadata.
- 7        3. render\_model: rendered images for test images.
- 8        4. results.json: estimated rendering qualities for the scene.

#### 9    **A.1.2    Full data link**

- 10       1. PeRFception-CO3D-link1: [https://1drv.ms/u/s!As9A9EbDsoWcbnHoOoqWmIB6RLs?](https://1drv.ms/u/s!As9A9EbDsoWcbnHoOoqWmIB6RLs?e=SYGC03)  
11       e=SYGC03
- 12       2. PeRFception-CO3D-link2: [https://1drv.ms/u/s!AgY2evoYo6FgiwomlG1QUiLg7wqy?](https://1drv.ms/u/s!AgY2evoYo6FgiwomlG1QUiLg7wqy?e=ReG5Yp)  
13       e=ReG5Yp
- 14       3. PeRFception-ScanNet: [https://1drv.ms/u/s!AgY2evoYo6FghYVw3MLYwq743fsoUw?](https://1drv.ms/u/s!AgY2evoYo6FghYVw3MLYwq743fsoUw?e=y1F8KX)  
15       e=y1F8KX

16    We also provide guides for using our dataset on our project page: [https://postech-cvlab.](https://postech-cvlab.github.io/PeRFception/)  
17    [github.io/PeRFception/](https://postech-cvlab.github.io/PeRFception/).

### 18    **A.2    Maintenance and Plans for Releasing**

#### 19    **A.2.1    Long-term Perservation**

20    We have publicly released our full data and their generation code in our GitHub repository (<https://github.com/POSTECH-CVLab/PeRFception>). Hosting is done on the publicly accessible cloud  
21    service, OneDrive.

#### 23    **A.2.2    License**

24    The PeRFception datasets are released under the Attribution-ShareAlike 4.0 International (CC BY-SA  
25    4.0) license<sup>1</sup>, which allows anybody to use them for remix, transform, or build upon the material.

---

<sup>1</sup><https://creativecommons.org/licenses/by-sa/4.0/>
